# Supplementary material for: Characterizing Protein Interactions Employing a Genome-Wide siRNA Cellular Phenotyping Screen
Source: PLoS Comput Biol. 2014 Sep 25;10(9):e1003814. doi: 10.1371/journal.pcbi.1003814 (PMC4178005; doi:10.1371/journal.pcbi.1003814)
Supplement: Table S3 — Predictions for activation and inhibition. (XLS) [file pcbi.1003814.s006.xls]

## Sheet: TableS3aPredictionForActivation
Table S3 (a) Predictions for activation
Gene symbol gene 1	Gene symbol gene 2	EntrezGene gene 1	EntrezGene gene 2	Votes	Confidence	ESR	HIPPIE Score	DOMINE	DOMINE_LABEL
COL1A1	FLNB	1277	2317	995	0.911575	0.105082	0.63	NaN	none
DLL4	JAG1	54567	182	998	0.916653	0.10834	NA	HC	valid
CASP3	IL18	836	3606	985	0.895012	0.0362399	0.52	NaN	none
ITGA9	ITGB1	3680	3688	967	0.86657	0.046111	0.86	HC	valid
GNA13	RDX	10672	5962	936	0.821542	0.0197733	0.79	NaN	none
F7	F8	2155	2157	988	0.899923	0.160113	NA	HC	valid
MAPK14	RIPK2	1432	8767	985	0.895012	0.22671	NA	HC	valid
IGF1R	PTPN1	3480	5770	995.5	0.912418	0.1569	0.89	HC	valid
IL15	IL7R	3600	3575	952	0.844173	0.257733	NA	LC	less_valid
ERBB4	NCK2	2066	8440	948	0.838395	0.201553	0.56	LC	less_valid
JAK2	LCK	3717	3932	973	0.875858	0.131081	NA	HC	valid
ABLIM3	NCK1	22885	4690	985	0.895012	0.147241	NA	LC	less_valid
EGF	TJP1	1950	7082	1000	0.920066	0.11485	NA	LC	less_valid
CD5	CD79A	921	973	932	0.816081	0.101821	0.52	NaN	none
CAV1	TNFRSF1A	857	7132	944	0.832698	0.239178	0.49	NaN	none
NEDD4	RPS6KA3	4734	6197	948	0.838395	0.257733	0.52	MC	less_valid
MAP2K1	MAPK8IP3	5604	23162	992	0.906548	0.353248	0.95	NaN	none
AKT2	LAMC1	208	3915	956	0.850032	0.0592581	0.63	NaN	none
CD4	LCP2	920	3937	977	0.882156	0.0985584	NA	HC	valid
GNAI1	GNAO1	2770	2775	971	0.872741	0.0559731	0.59	HC	valid
SRC	TRAF6	6714	7189	941	0.828477	0.390167	0.83	NaN	none
SMAD6	STAMBP	4091	10617	931	0.814728	0.294266	0.78	NaN	none
CD4	CD8B	920	926	943	0.831286	0.163323	NA	HC	valid
ATM	PPP1CC	472	5501	944	0.832698	0.0887573	0.63	NaN	none
CARD11	TRAF2	84433	7186	944	0.832698	0.26694	NA	LC	less_valid
PLCG1	SRC	5335	6714	999	0.918357	0.344564	0.85	HC	valid
CANX	TNFRSF1A	821	7132	992	0.906548	0.220448	0.79	NaN	none
CD247	CD3D	919	915	965	0.863516	0.182507	0.55	HC	valid
CCNH	MCM7	902	4176	967	0.86657	0.0362399	0.83	NaN	none
HSP90AA1	MS4A2	3320	2206	958	0.852992	0.321119	0.52	NaN	none
MLLT4	SRC	4301	6714	987	0.898281	0.420462	0.79	HC	valid
CAMK2A	MDM2	815	4193	986	0.896644	0.0920263	NA	LC	less_valid
ARRB2	RAB11FIP5	409	26056	999	0.918357	0.0789389	0.63	LC	less_valid
ACTB	GNAI2	60	2771	931.5	0.815404	0.0164784	0.55	NaN	none
HSPA8	NFKB1	3312	4790	928.5	0.811367	0.223581	0.63	LC	less_valid
HGS	IL2RB	9146	3560	1000	0.920066	0.483358	0.88	NaN	none
BIRC2	LTBR	329	4055	960	0.855973	0.0691052	0.52	NaN	none
NEDD4	STK4	4734	6789	997	0.914955	0.586543	0.56	MC	less_valid
ACTB	ARRB1	60	408	925.5	0.807373	0.312222	0.63	NaN	none
NEDD4	PRKX	4734	5613	936	0.821542	0.105082	0.52	MC	less_valid
POLR1D	POLR3D	51082	661	967	0.86657	0.0691052	0.72	NaN	none
ADAM17	ERBB4	6868	2066	936	0.821542	0.420462	0.52	NaN	none
CAV1	PTPN1	857	5770	1000	0.920066	0.263876	0.9	NaN	none
BDKRB2	CCL21	624	6366	991	0.904884	0.0723847	NA	HC	valid
PRKCQ	VCAM1	5588	7412	954	0.847092	0.172931	NA	HC	valid
PIP5K1A	PIP5KL1	8394	138429	991	0.904884	0.282177	0.73	NaN	none
ERBB4	NCK1	2066	4690	970	0.87119	0.12135	0.72	LC	less_valid
ATP6V1D	MYC	51382	4609	970	0.87119	0.315194	0.63	NaN	none
RET	SOS1	5979	6654	970	0.87119	0.201553	0.63	LC	less_valid
CRK	ERBB4	1398	2066	990	0.903225	0.364732	0.74	LC	less_valid
AP2M1	CRK	1173	1398	995	0.911575	0.329959	0.63	NaN	none
PTPN1	SRC	5770	6714	971.5	0.873518	0.315194	1	HC	valid
ERBB3	SRC	2065	6714	994	0.909894	0.749719	0.63	HC	valid
EPN2	TUBA1B	22905	10376	956	0.850032	0.651472	0.55	NaN	none
ACVR2A	SMURF2	92	64750	1000	0.920066	0.0428215	NA	HC	valid
FGF12	NEDD4	2257	4734	995	0.911575	0.444574	0.56	NaN	none
BLNK	JAK3	29760	3718	995	0.911575	0.188872	NA	LC	less_valid
ERBB2	RAC2	2064	5880	937.5	0.823609	0.201553	NA	MC	less_valid
KNG1	PLG	3827	5340	955	0.848559	0.204713	0.75	NaN	none
DGKD	DGKH	8527	160851	990	0.903225	0.0658243	0.73	HC	valid
CAV1	GRK1	857	6011	991	0.904884	0.294266	0.75	NaN	none
MS4A2	PRKCD	2206	5580	987	0.898281	0.0952934	0.52	NaN	none
COL1A1	EGF	1277	1950	1000	0.920066	0.251568	NA	MC	less_valid
CLTC	IKBKB	1213	3551	973	0.875858	0.303271	0.72	LC	less_valid
JAG1	MFNG	182	4242	976	0.880574	0.315194	0.52	NaN	none
CRB3	PARD6A	92359	50855	981	0.888541	0.188872	0.67	NaN	none
BCL10	NFKBIA	8915	4792	963	0.860483	0.285208	0.63	NaN	none
AKT1	PLCG1	207	5335	946	0.835536	0.22671	0.68	HC	valid
DRD2	EPB41L1	1813	2036	979	0.885338	0.0822135	0.78	NaN	none
CBL	HGS	867	9146	997	0.914955	0.172931	NA	HC	valid
BMPR2	SMAD6	659	4091	986	0.896644	0.111597	NA	HC	valid
ACTN1	YES1	87	7525	991	0.904884	0.11485	NA	HC	valid
DAB2	SOD1	1601	6647	991	0.904884	0.288233	0.63	NaN	none
NOS3	PPP2R5A	4846	5525	999	0.918357	0.185691	0.62	NaN	none
ACVR2B	BMP6	93	654	969	0.869645	0.10834	0.72	HC	valid
GNAO1	PIK3R1	2775	5295	990.5	0.904053	0.0887573	0.63	NaN	none
JAK3	LCK	3718	3932	994	0.909894	0.0625419	0.65	HC	valid
HTR2C	TRHR	3358	7201	970	0.87119	0.182507	NA	HC	valid
CXCL1	IL8	2919	3576	933	0.817439	0.131081	NA	HC	valid
GRM5	PRKCQ	2915	5588	993	0.908218	0.0985584	0.52	HC	valid
NFKB1	PRKDC	4790	5591	988	0.899923	0.0625419	0.63	LC	less_valid
ATP6V0A4	ATP6V1A	50617	523	972	0.874296	0.312222	NA	HC	valid
PIK3R1	SOCS7	5295	30837	979	0.885338	-0.10834	0.52	HC	valid
MDM2	MYD88	4193	4615	995	0.911575	0.160113	0.49	NaN	none
ACP1	INSR	52	3643	964	0.861997	0.160113	0.52	NaN	none
MAPK3	RXRG	5595	6258	983	0.891765	0.0164784	NA	HC	valid
CDC25A	IL3RA	993	3563	987	0.898281	0.0887573	0.49	NaN	none
C3	FLNB	718	2317	998	0.916653	0.282177	0.63	NaN	none
BLNK	PLCG1	29760	5335	925	0.806712	0.207869	0.55	HC	valid
CHRM1	HTR2B	1128	3357	994	0.909894	0.21102	NA	HC	valid
PIP5K1B	PIP5KL1	8395	138429	973	0.875858	0.321119	0.73	NaN	none
FLT4	KDR	2324	3791	995	0.911575	0.207869	0.84	HC	valid
FLT1	LDLR	2321	3949	998	0.916653	0.288233	0.72	NaN	none
HGS	SMAD3	9146	4088	996	0.913262	0.214167	0.55	NaN	none
CHMP4B	CHMP4C	128866	92421	989	0.901571	0.657126	0.79	MC	less_valid
CLTC	EHD1	1213	10938	944	0.832698	0.480828	0.75	NaN	none
INPPL1	SRC	3636	6714	975	0.878996	0.248478	0.55	HC	valid
BTC	ERBB2	685	2064	942	0.829879	0.263876	0.52	NaN	none
ATR	IKBKG	545	8517	954	0.847092	0.046111	0.72	NaN	none
AP1B1	AP1M1	162	8907	974	0.877424	0.626117	0.72	HC	valid
AURKA	PLK1	6790	5347	921	0.801463	-0.00659186	0.63	HC	valid
GADD45G	SH3GLB2	10912	56904	988	0.899923	0.321119	0.63	NaN	none
LAMB1	LAMC1	3912	3915	970	0.87119	0.0756626	0.87	HC	valid
ATP6V0A4	ATP6V0D2	50617	245972	987	0.898281	0.297273	NA	HC	valid
CALM3	CAMKK1	808	84254	969	0.869645	0.0854863	0.52	NaN	none
ARRB2	NEDD4	409	4734	998	0.916653	0.48588	0.72	MC	less_valid
BMPR1B	ERBB2	658	2064	993	0.908218	0.0920263	NA	HC	valid
ACVR2B	SMAD1	93	4086	974	0.877424	0.312222	NA	HC	valid
CCNA2	TP53	890	7157	998	0.916653	0.0493994	0.85	NaN	none
BDKRB1	TBXA2R	623	6915	980	0.886936	0.118102	NA	HC	valid
FGR	LCK	2268	3932	951	0.842721	0.0493994	NA	HC	valid
AKT1	USP8	207	9101	994	0.909894	0.198389	0.72	HC	valid
ACTN1	FYN	87	2534	945.5	0.834825	0.0658243	NA	HC	valid
HK2	SLC2A4	3099	6517	985	0.895012	0.00329597	0.59	NaN	none
FLT4	SOS1	2324	6654	965	0.863516	0.124596	NA	LC	less_valid
ATM	IKBKG	472	8517	924	0.805392	0.046111	0.68	NaN	none
ATP6V1A	ATP6V1C2	523	245973	981	0.888541	0.214167	NA	MC	less_valid
CACNA1A	CALM3	773	808	964.5	0.862756	0.303271	0.63	NaN	none
ABL2	ERBB4	27	2066	969	0.869645	0.12135	0.63	HC	valid
ADRA1B	HTR2B	147	3357	995	0.911575	0.19522	NA	HC	valid
FASN	MAPK3	2194	5595	974	0.877424	0.0559731	0.63	MC	less_valid
ADRB2	IL1B	154	3553	998	0.916653	0.21102	0.52	NaN	none
CYC1	UQCRH	1537	7388	947	0.836963	0.0197733	0.59	NaN	none
SOS1	TLN1	6654	7094	990	0.903225	0.105082	NA	HC	valid
BDKRB2	PTGER1	624	5731	998	0.916653	0.232954	NA	HC	valid
BCAR1	SRC	9564	6714	957	0.851509	0.306261	0.97	HC	valid
FLNC	HSPA8	2318	3312	967	0.86657	0.232954	0.63	NaN	none
MAP4K3	TRAF2	8491	7186	974	0.877424	0.658995	0.49	HC	valid
FLNB	VCL	2317	7414	926	0.808036	0.21102	0.63	NaN	none
ATP6V0C	ATP6V1B2	527	526	1000	0.920066	0.321119	NA	LC	less_valid
PTK2	SPTAN1	5747	6709	995	0.911575	0.111597	NA	LC	less_valid
CNTFR	IL6	1271	3569	951	0.842721	0.232954	NA	LC	less_valid
PDPK1	PRKCQ	5170	5588	938	0.824301	0.19522	0.63	HC	valid
ACVR2A	BMPR2	92	659	1000	0.920066	0.353248	NA	HC	valid
CCND1	MAPK3	595	5595	982	0.89015	0.179319	NA	HC	valid
FGF2	KDR	2247	3791	978	0.883744	0.373274	NA	LC	less_valid
TP53	TSG101	7157	7251	964	0.861997	0.204713	0.84	NaN	none
ARFGAP1	MYC	55738	4609	931	0.814728	0.12135	0.63	NaN	none
CRHR1	GNAQ	1394	2776	950	0.841274	0.188872	0.73	NaN	none
GRIN2B	NOS1	2904	4842	991	0.904884	0.118102	NA	HC	valid
IL2RB	RAF1	3560	5894	995	0.911575	0.417745	0.52	NaN	none
MAP3K5	TNFRSF1A	4217	7132	995	0.911575	0.10834	NA	HC	valid
CCNE2	CDK2	9134	1017	1000	0.920066	0.0526868	0.96	HC	valid
PDGFRB	PTPRJ	5159	5795	962	0.858975	0.0854863	0.87	HC	valid
ACOX3	EHHADH	8310	1962	955.5	0.849295	0.682555	NA	LC	less_valid
LYN	MAP3K3	4067	4215	924	0.805392	0.118102	0.72	HC	valid
DAPP1	HCK	27071	3055	952	0.844173	0.510653	NA	HC	valid
CASP1	PAK1	834	5058	979	0.885338	0.11485	0.55	HC	valid
CLDN3	PRKACA	1365	5566	969.5	0.870417	0.176127	0.55	NaN	none
ABL1	ERBB2	25	2064	998	0.916653	0.179319	0.63	HC	valid
CCND1	IKBKB	595	3551	983	0.891765	0.144015	NA	HC	valid
HTR2B	PTGER1	3357	5731	935	0.820169	0.12784	NA	HC	valid
AKT1	CASP8	207	841	939	0.825688	0.144015	NA	LC	less_valid
CTSL1	RELB	1514	5971	979	0.885338	0.26694	0.49	NaN	none
RET	SRC	5979	6714	948	0.838395	0.493397	0.83	HC	valid
CDC27	CTNNB1	996	1499	941	0.828477	-0.00659186	0.56	LC	less_valid
HTR2C	PTGER1	3358	5731	988	0.899923	0.381752	NA	HC	valid
FZR1	MYC	51343	4609	926	0.808036	0.0263617	0.63	LC	less_valid
FGF13	MAPK8IP2	2258	23542	969	0.869645	0.404048	0.72	NaN	none
ARRB2	IGF1R	409	3480	999	0.918357	0.321119	0.63	NaN	none
PRKG1	TP53	5592	7157	957	0.851509	0.124596	NA	HC	valid
TBK1	TRAF2	29110	7186	960	0.855973	0.118102	0.96	HC	valid
EGF	FN1	1950	2335	925.5	0.807373	0.0920263	NA	HC	valid
CALM3	YWHAQ	808	10971	965	0.863516	0.0329479	0.73	NaN	none
CD4	STAT1	920	6772	980	0.886936	0.111597	NA	HC	valid
HCK	PLAUR	3055	5329	994	0.909894	0.140786	0.76	LC	less_valid
PXN	TLN1	5829	7094	990	0.903225	0.111597	0.87	NaN	none
PRKAR1B	SMAD4	5575	4089	945	0.834114	0.0952934	0.52	NaN	none
MAPK7	PTPRR	5598	5801	929	0.812037	0.318159	0.79	HC	valid
HSP90AA1	RAF1	3320	5894	922	0.802768	0.204713	0.84	NaN	none
EPHA7	LCK	2045	3932	957	0.851509	0.0362399	NA	HC	valid
ACVR1	ACVR1C	90	130399	967	0.86657	0.105082	NA	HC	valid
USP8	VPS24	9101	51652	977	0.882156	0.201553	0.56	NaN	none
MAP2K4	MAP3K11	6416	4296	999	0.918357	0.0131832	0.65	HC	valid
ATP6V0A1	ATP6V1H	535	51606	978	0.883744	0.503306	NA	HC	valid
FLNC	FYN	2318	2534	1000	0.920066	0.1569	0.63	HC	valid
MAP4K1	SRC	11184	6714	999	0.918357	0.33582	0.63	HC	valid
CBLB	NEDD4	868	4734	966	0.86504	0.417745	0.79	HC	valid
CD40	RIPK2	958	8767	967	0.86657	0.111597	0.83	HC	valid
PLAT	SERPING1	5327	710	939	0.825688	0.0559731	0.52	HC	valid
AKT1	FGF2	207	2247	999	0.918357	0.260807	NA	LC	less_valid
FLNC	PIK3R1	2318	5295	1000	0.920066	0.137554	0.63	LC	less_valid
JAK1	PLCG2	3716	5336	927.5	0.810031	0.444574	0.52	LC	less_valid
DAAM1	SRC	23002	6714	1000	0.920066	0.11485	0.68	MC	less_valid
GALNS	NEU1	2588	4758	997	0.914955	0.276099	0.55	NaN	none
HIF1A	STAT3	3091	6774	999	0.918357	0.0197733	0.74	NaN	none
ERBB2	TLN1	2064	7094	994	0.909894	0.0625419	0.63	NaN	none
CAV1	ILK	857	3611	990	0.903225	0.220448	0.55	NaN	none
IL1RAP	PIK3R1	3556	5295	992	0.906548	0.0854863	0.55	NaN	none
IRS1	YWHAH	3667	7533	998	0.916653	0.0362399	0.72	NaN	none
PIK3C2B	PIK3R1	5287	5295	962	0.858975	0.176127	0.63	HC	valid
BDKRB1	CXCR6	623	10663	938	0.824301	0.166529	NA	HC	valid
HSPA8	SOD1	3312	6647	945	0.834114	0.169732	0.63	LC	less_valid
BLNK	CD79B	29760	974	969	0.869645	0.166529	NA	HC	valid
ITGA11	ITGB5	22801	3693	925	0.806712	0.260807	NA	HC	valid
ADRB2	NOS1	154	4842	971	0.872741	0.376107	0.52	HC	valid
CRK	PRKCG	1398	5582	966.667	0.866059	0.303271	NA	HC	valid
BUB1	PPP1CC	699	5501	926.5	0.8087	0.0493994	NA	HC	valid
BDKRB1	HTR2B	623	3357	999	0.918357	0.0822135	NA	HC	valid
SMAD7	SRF	4092	6722	997	0.914955	0.185691	0.63	NaN	none
IL2RB	IL2RG	3560	3561	966.5	0.865804	0.332893	0.84	NaN	none
CD8B	SYK	926	6850	953	0.84563	0.0920263	NA	HC	valid
ABL1	PTPN6	25	5777	994	0.909894	-0.0854863	0.85	HC	valid
ATP6V0A4	ATP6V1D	50617	51382	980	0.886936	0.329959	NA	HC	valid
AKT1	EEA1	207	8411	954	0.847092	0.12135	NA	HC	valid
ARSB	MYC	411	4609	969	0.869645	0.150464	0.63	NaN	none
DNM1	SH3GL3	1759	6457	997	0.914955	0.263876	0.64	HC	valid
ARRB2	MDM2	409	4193	1000	0.920066	0.254653	0.9	NaN	none
AP2A1	AP2B1	160	163	931	0.814728	0.641884	NA	HC	valid
EEA1	ZFYVE16	8411	9765	989	0.901571	0.513085	0.58	HC	valid
CSF2	IL3RA	1437	3563	969.5	0.870417	0.263876	0.52	NaN	none
BMPR2	TGFB1	659	7040	946	0.835536	0.0625419	NA	HC	valid
CAV1	F2R	857	2149	995	0.911575	0.69808	0.63	NaN	none
AP1B1	CLTC	162	1213	999	0.918357	0.706433	0.85	MC	less_valid
CD4	JAK2	920	3717	987	0.898281	0.137554	NA	HC	valid
COL5A1	COL5A3	1289	50509	920	0.800162	0.118102	0.66	LC	less_valid
AP1B1	AP1G1	162	164	998	0.916653	0.647661	0.94	HC	valid
PIAS1	PIAS2	8554	9063	930	0.81338	0.306261	0.65	NaN	none
LYN	TEC	4067	100124696	993	0.908218	0.198389	0.85	HC	valid
RELA	SRF	5970	6722	998	0.916653	0.131081	0.75	NaN	none
CASP3	SRF	836	6722	981	0.888541	0.21731	0.52	LC	less_valid
HSPA8	SEC61B	3312	10952	992	0.906548	0.239178	0.63	NaN	none
FGFR2	PPM1A	2263	5494	982	0.89015	0.269999	0.49	NaN	none
CCND1	SRC	595	6714	996.5	0.914108	0.236068	0.49	NaN	none
GNAO1	GNAZ	2775	2781	992	0.906548	0.207869	NA	HC	valid
GGA3	IGF2R	23163	3482	969	0.869645	0.359004	0.86	NaN	none
CD3E	SYK	916	6850	969	0.869645	0.185691	0.89	NaN	none
ADORA2B	LHCGR	136	3973	989	0.901571	0.223581	NA	HC	valid
SH3GL1	SH3GL3	6455	6457	974	0.877424	0.260807	0.76	HC	valid
IL6ST	SOS1	3572	6654	920	0.800162	0.144015	NA	LC	less_valid
CD79A	CD8A	973	925	950	0.841274	0.134319	NA	HC	valid
F2	PLAT	2147	5327	985	0.895012	0.0985584	0.78	HC	valid
FLNC	MYH10	2318	4628	1000	0.920066	0.10834	0.63	HC	valid
IRF3	TANK	3661	10010	941	0.828477	0.0691052	0.72	NaN	none
CD86	PIK3R2	942	5296	975	0.878996	0.166529	NA	HC	valid
CHMP4C	STAMBP	92421	10617	940	0.82708	0.412288	0.63	NaN	none
EP300	PPARA	2033	5465	967	0.86657	0.0625419	0.87	LC	less_valid
ARF6	SOD2	382	6648	1000	0.920066	0.273051	0.63	NaN	none
BCL2L1	PSEN1	598	5663	995	0.911575	0.201553	0.75	NaN	none
NCK1	SYNJ2	4690	8871	986	0.896644	0.242283	0.82	MC	less_valid
FASN	IKBKG	2194	8517	982	0.89015	-0.00329597	0.72	NaN	none
IKBKB	PRKCI	3551	5584	968.5	0.868874	0.201553	0.68	HC	valid
FGB	FGG	2244	2266	975	0.878996	0.279141	0.78	NaN	none
CD28	CD8A	940	925	996	0.913262	0.282177	NA	HC	valid
CTNNB1	PSEN2	1499	5664	999	0.918357	0.169732	0.52	NaN	none
NLK	STAT3	51701	6774	1000	0.920066	-0.00329597	0.71	HC	valid
CXCR6	GNG2	10663	54331	953	0.84563	0.273051	NA	HC	valid
PIK3CA	TICAM1	5290	148022	933	0.817439	0.0691052	0.52	NaN	none
PIK3CA	PRKCD	5290	5580	997.5	0.915803	0.1569	0.52	LC	less_valid
CSNK2A2	MAPK14	1459	1432	984	0.893386	0.169732	0.62	HC	valid
PRKAA2	ULK2	5563	9706	996	0.913262	0.0756626	0.63	HC	valid
AP2A1	EHD1	160	10938	934	0.818802	0.417745	0.75	NaN	none
HGS	NEDD4L	9146	23327	939	0.825688	0.620068	0.52	NaN	none
MAPK3	ULK2	5595	9706	951	0.842721	0.201553	0.63	HC	valid
BDKRB2	CCL16	624	6360	984	0.893386	0.0493994	NA	HC	valid
NFKB1	PRKCI	4790	5584	930	0.81338	0.332893	NA	HC	valid
APC	PPP2R5A	324	5525	953	0.84563	0.12135	0.79	NaN	none
CAMK2A	JAK1	815	3716	961	0.857471	0.303271	NA	HC	valid
BCL10	CARD9	8915	64170	990	0.903225	0.201553	0.79	HC	valid
CHMP2A	STAMBP	27243	10617	957	0.851509	0.232954	0.86	NaN	none
BDKRB2	TACR1	624	6869	993	0.908218	0.105082	NA	HC	valid
ACTG1	RELB	71	5971	988	0.899923	0.0952934	0.72	NaN	none
ACTB	MDM2	60	4193	990	0.903225	0.312222	0.63	NaN	none
GNA11	PTGIR	2767	5739	990	0.903225	-0.046111	0.52	HC	valid
ITCH	SH3GLB1	83737	51100	969	0.869645	0.182507	0.63	HC	valid
EGF	ERBB3	1950	2065	946.5	0.836249	0.457699	0.75	LC	less_valid
ABL1	PXN	25	5829	921	0.801463	0	0.62	LC	less_valid
HSPA8	TRADD	3312	8717	974	0.877424	0.0263617	0.72	NaN	none
CAV2	RASA1	858	5921	997	0.914955	0.236068	0.88	NaN	none
CCL16	CCL5	6360	6352	991	0.904884	0.0952934	NA	HC	valid
ABL1	SYNJ2	25	8871	999	0.918357	0.332893	0.7	MC	less_valid
ABL1	CBLB	25	868	976	0.880574	-0.150464	NA	HC	valid
ACVR1	BMP4	90	652	923	0.804078	0.21731	NA	HC	valid
PTAFR	PTGER1	5724	5731	956	0.850032	0.273051	NA	HC	valid
CHMP2A	CHMP4B	27243	128866	993	0.908218	0.47829	NA	MC	less_valid
HGS	MKNK1	9146	8569	968	0.868105	0.367586	0.63	NaN	none
CAV1	KDR	857	3791	994.5	0.910734	0.359004	0.52	NaN	none
PTK2B	ZAP70	2185	7535	970	0.87119	0.172931	0.52	HC	valid
CAV1	PRKACA	857	5566	987.5	0.899101	0.370434	0.72	NaN	none
CCND1	ID2	595	3398	997	0.914955	0.185691	NA	LC	less_valid
FLNC	PTPRJ	2318	5795	1000	0.920066	0.251568	0.63	NaN	none
MYD88	RIPK2	4615	8767	978	0.883744	0.176127	NA	HC	valid
MYD88	TRAF2	4615	7186	961.5	0.858222	0.332893	0.52	HC	valid
DAB2	SRC	1601	6714	975	0.878996	0.329959	0.89	HC	valid
PTAFR	TYK2	5724	7297	974	0.877424	0.11485	0.52	NaN	none
ATP6V0A2	ATP6V1H	23545	51606	931	0.814728	0.417745	NA	HC	valid
TICAM1	TRAF2	148022	7186	934	0.818802	0.192048	0.73	NaN	none
JAK2	PLCG2	3717	5336	966.5	0.865804	0.347465	0.52	HC	valid
CREBBP	MAML1	1387	9794	995	0.911575	0.1569	0.73	NaN	none
ATP6V1D	ATP6V1F	51382	9296	996	0.913262	0.457699	NA	HC	valid
HSPA8	TRAF2	3312	7186	933	0.817439	0.248478	0.72	NaN	none
DGKA	SRC	1606	6714	985	0.895012	0.332893	0.81	MC	less_valid
BDKRB1	PPBP	623	5473	970	0.87119	0.0854863	NA	HC	valid
BAD	PAK1	572	5058	923.5	0.804735	0.12784	0.63	NaN	none
CAV1	PTPRF	857	5792	947	0.836963	0.166529	0.78	NaN	none
CAMK2A	STAT1	815	6772	926	0.808036	0.11485	NA	HC	valid
CX3CL1	IL8	6376	3576	979	0.885338	0.291252	NA	HC	valid
ERBB2	JAK2	2064	3717	974	0.877424	0.124596	0.73	HC	valid
PIK3CB	YWHAQ	5291	10971	941	0.828477	-0.00329597	0.74	LC	less_valid
FYN	JAK1	2534	3716	969	0.869645	0.124596	NA	HC	valid
ATP6V1E2	ATP6V1H	90423	51606	997	0.914955	0.0887573	NA	HC	valid
NTRK1	PTPN11	4914	5781	1000	0.920066	0.0164784	0.52	LC	less_valid
CASP3	YWHAE	836	7531	999	0.918357	0.0362399	0.75	NaN	none
MAP3K1	MAP4K2	4214	5871	984	0.893386	0.306261	0.87	HC	valid
ECSIT	SMURF1	51295	57154	993	0.908218	0.433934	0.52	NaN	none
NKD1	PPP2R1A	85407	5518	949	0.839832	0.0329479	0.73	NaN	none
MAPK14	PI4K2B	1432	55300	989	0.901571	0.1569	0.52	LC	less_valid
IL2	IL21R	3558	50615	963	0.860483	0.229834	0.72	NaN	none
CSF1R	EGF	1436	1950	954	0.847092	0.150464	NA	HC	valid
PSEN1	TRAF6	5663	7189	957	0.851509	0.0691052	0.72	NaN	none
GHR	TGFBR1	2690	7046	970	0.87119	0.0296551	NA	HC	valid
CBL	CD3E	867	916	963	0.860483	0.169732	NA	HC	valid
CAV2	PLD2	858	5338	996	0.913262	0.46548	0.52	NaN	none
CALM3	THOP1	808	7064	999	0.918357	0.12784	0.75	NaN	none
FLNB	SRC	2317	6714	977	0.882156	0.318159	0.63	HC	valid
ACTG1	TRAF2	71	7186	974.5	0.87821	0.239178	0.72	LC	less_valid
ATP6V0A4	ATP6V1E1	50617	529	926	0.808036	0.404048	NA	HC	valid
GIT1	GRK6	28964	2870	941	0.828477	0.303271	0.52	LC	less_valid
BDKRB1	CCL16	623	6360	983	0.891765	0.239178	NA	HC	valid
ARHGDIB	CDC42	397	998	951	0.842721	0.00659186	0.61	HC	valid
MAPK14	ZFYVE20	1432	64145	991	0.904884	0.166529	0.55	NaN	none
AP3B1	ARF6	8546	382	997	0.914955	0.26694	0.75	HC	valid
FLNC	SH3GLB1	2318	51100	998	0.916653	0.417745	0.63	HC	valid
HSP90AA1	RIPK2	3320	8767	929	0.812037	0.232954	0.72	HC	valid
CAV1	GRK5	857	2869	998	0.916653	0.517925	0.75	NaN	none
CLTC	RELA	1213	5970	940	0.82708	0.232954	0.72	NaN	none
RAF1	TBXA2R	5894	6915	994	0.909894	0.0592581	0.52	NaN	none
CBL	CD5	867	921	957	0.851509	0.0625419	0.73	NaN	none
GNB2	GSK3B	2783	2932	953	0.84563	0.0822135	0.63	HC	valid
E2F1	E2F3	1869	1871	950	0.841274	0.0329479	NA	LC	less_valid
CASP7	TNFRSF1A	840	7132	941	0.828477	0.0395311	0.79	LC	less_valid
FYN	TXK	2534	7294	956	0.850032	0.111597	0.55	HC	valid
ARRB2	ITCH	409	83737	988	0.899923	0.198389	0.88	MC	less_valid
CD40	IL4R	958	3566	981	0.888541	0.0952934	0.55	NaN	none
AKT1	TIAM1	207	7074	960	0.855973	0.118102	NA	HC	valid
CAV1	INSR	857	3643	995	0.911575	0.0887573	0.73	NaN	none
NFKB1	VPS4A	4790	27183	987	0.898281	0.321119	0.49	HC	valid
ACVR1	PAK1	90	5058	976	0.880574	0.19522	0.52	HC	valid
ACTB	EP300	60	2033	922	0.802768	0.0658243	0.63	LC	less_valid
PPARA	PPARGC1A	5465	10891	963	0.860483	0.0263617	0.78	HC	valid
PLCB3	PRKG1	5331	5592	952	0.844173	0.0854863	0.52	HC	valid
CTSB	CTSD	1508	1509	991	0.904884	0.460301	0.52	NaN	none
EGF	VTN	1950	7448	948	0.838395	0.300275	0.75	HC	valid
AKT1	ARRB2	207	409	937.5	0.823609	0.324072	0.75	NaN	none
POLR2H	POLR2L	5437	5441	951	0.842721	0.338741	0.82	LC	less_valid
AP3B1	ARRB1	8546	408	999	0.918357	0.35036	0.76	NaN	none
MALT1	NFKBIA	10892	4792	965	0.863516	0.0395311	0.63	NaN	none
IL1A	TLR2	3552	7097	929.5	0.812708	0.19522	NA	LC	less_valid
PTPRC	PXN	5788	5829	993	0.908218	0.0658243	0.68	NaN	none
F2	PLAU	2147	5328	941	0.828477	0.0887573	0.62	HC	valid
ITCH	SRC	83737	6714	947	0.836963	0.285208	0.63	HC	valid
CTSG	F2R	1511	2149	987	0.898281	0.376107	0.52	NaN	none
ADRB2	GNA11	154	2767	986	0.896644	0.279141	0.52	HC	valid
COL1A1	VWF	1277	7450	1000	0.920066	0.169732	0.76	MC	less_valid
CAMK2B	MAP3K5	816	4217	975	0.878996	-0.0131832	NA	HC	valid
CCND2	PITX2	894	5308	1000	0.920066	0.232954	NA	LC	less_valid
PIN1	RELA	5300	5970	949	0.839832	0.11485	0.55	NaN	none
IL8	WASF1	3576	8936	989	0.901571	0.248478	0.52	NaN	none
SRC	STAT6	6714	6778	934	0.818802	-0.0723847	0.52	HC	valid
PRKCD	VCAM1	5580	7412	955	0.848559	0.0658243	NA	HC	valid
ERBB2	JAK1	2064	3716	991	0.904884	0.21731	0.63	HC	valid
ACTB	HSP90AA1	60	3320	927	0.809365	0.276099	0.55	NaN	none
MAP2K6	TAOK1	5608	57551	996	0.913262	0.417745	NA	HC	valid
AKT1	STAT5A	207	6776	998	0.916653	0.0756626	NA	HC	valid
IKBKB	RIPK2	3551	8767	972	0.874296	0.176127	NA	HC	valid
BCL10	NFKB1	8915	4790	951	0.842721	0.242283	NA	HC	valid
ACTB	PPP1CC	60	5501	929.5	0.812708	0.0691052	NA	LC	less_valid
PAK1	SMAD1	5058	4086	1000	0.920066	0.176127	0.52	HC	valid
TACR1	TRHR	6869	7201	922	0.802768	0.11485	NA	HC	valid
ACTN1	CDH1	87	999	979	0.885338	0.0263617	0.72	NaN	none
CCL16	CCL25	6360	6370	963	0.860483	0.134319	NA	HC	valid
MAP3K7	SMAD7	6885	4092	961.5	0.858222	0.124596	0.73	NaN	none
CREBBP	PRKCD	1387	5580	938.667	0.825225	0.236068	0.55	MC	less_valid
ATP6V1C1	ATP6V1E1	528	529	980	0.886936	0.525124	NA	MC	less_valid
BDKRB2	NOS1	624	4842	950	0.841274	0.134319	0.73	HC	valid
KLKB1	SERPING1	3818	710	942	0.829879	0.41502	NA	HC	valid
BCAR1	IGF1R	9564	3480	990	0.903225	0.0756626	NA	LC	less_valid
ARRB1	TUBA4A	408	7277	977	0.882156	0.179319	0.63	NaN	none
ACVR1	SMAD1	90	4086	989	0.901571	0.239178	0.85	HC	valid
TRAF6	TUBB	7189	203068	998	0.916653	0.150464	0.72	NaN	none
FN1	THBS1	2335	7057	994	0.909894	0.0822135	0.62	NaN	none
GNB5	GNGT2	10681	2793	978	0.883744	0.0952934	NA	HC	valid
PDGFRB	STAT1	5159	6772	989	0.901571	0.153684	0.65	HC	valid
MAP4K3	TNFRSF1A	8491	7132	995	0.911575	0.263876	NA	HC	valid
TAOK3	TRAF2	51347	7186	976	0.880574	0.118102	0.88	HC	valid
GBA	NEDD4	2629	4734	992	0.906548	0.344564	0.52	NaN	none
LCP2	MAP3K1	3937	4214	961	0.857471	0.12784	NA	HC	valid
MDM2	TSG101	4193	7251	980	0.886936	0.220448	0.73	NaN	none
ADCY7	PRKCD	113	5580	947.25	0.837321	0.201553	0.52	HC	valid
RPS6KA4	RPS6KA5	8986	9252	983	0.891765	0.291252	NA	HC	valid
CAV1	HRAS	857	3265	967	0.86657	0.11485	0.66	NaN	none
CUL1	NLK	8454	51701	955	0.848559	-0.105082	0.72	MC	less_valid
EPB41L3	FLNC	23136	2318	1000	0.920066	0.0263617	0.63	NaN	none
AKT1	BCL10	207	8915	961	0.857471	0.0691052	0.77	HC	valid
MYC	NFKB1	4609	4790	959.5	0.855226	0.35036	NA	HC	valid
GGA3	NEDD4	23163	4734	1000	0.920066	0.46548	0.63	NaN	none
ERBB2	IL6ST	2064	3572	985	0.895012	0.306261	0.73	HC	valid
ID2	MAPK3	3398	5595	940	0.82708	0.364732	0.63	MC	less_valid
CAV1	SCP2	857	6342	992	0.906548	0.543955	0.98	NaN	none
ABL1	ATR	25	545	940	0.82708	0.0395311	0.83	NaN	none
MAP3K1	MAP4K1	4214	11184	959	0.85448	0.273051	NA	HC	valid
JAK2	TEC	3717	100124696	979	0.885338	0.134319	0.87	HC	valid
F2	KNG1	2147	3827	934	0.818802	0.0263617	0.52	NaN	none
LCK	PRKACA	3932	5566	997	0.914955	0.0658243	0.55	HC	valid
CSNK1A1	TGFBR1	1452	7046	951	0.842721	0.269999	0.52	HC	valid
ADRB2	CAV3	154	859	1000	0.920066	0.353248	0.63	NaN	none
MDM2	PPM1D	4193	8493	984	0.893386	0.0756626	0.78	NaN	none
CD22	LYN	933	4067	996	0.913262	0.12135	0.89	HC	valid
EEA1	GIT1	8411	28964	969	0.869645	0.390167	0.52	NaN	none
PROS1	TBK1	5627	29110	941	0.828477	0.0559731	0.63	HC	valid
ACTB	HSPA8	60	3312	949.5	0.840552	0.176127	0.77	NaN	none
ADRA1B	NOS1	147	4842	999	0.918357	0.229834	0.52	HC	valid
ITGA6	PDIA3	3655	2923	973	0.875858	0.0952934	0.63	NaN	none
AKT3	PRKCD	10000	5580	969.25	0.87003	0.11485	0.55	HC	valid
CTSB	PLAU	1508	5328	941	0.828477	0.124596	0.52	NaN	none
ATF2	MAPKAPK5	1386	8550	997	0.914955	0.220448	0.52	HC	valid
DDO	PEX5	8528	5830	991	0.904884	0.185691	0.76	NaN	none
CDK5	PAK1	1020	5058	952	0.844173	0.0263617	0.77	HC	valid
BLNK	CRKL	29760	1399	1000	0.920066	0.21731	0.73	HC	valid
AP3B1	AP3S1	8546	1176	942	0.829879	0.714592	NA	HC	valid
CCL21	CXCL1	6366	2919	981	0.888541	0.147241	NA	HC	valid
KNG1	PLAUR	3827	5329	960	0.855973	0.207869	0.75	NaN	none
PLD2	PTPN1	5338	5770	999	0.918357	0.118102	0.72	NaN	none
CREBBP	MAP3K5	1387	4217	927	0.809365	0.0296551	0.63	MC	less_valid
NFKBIA	PRKCI	4792	5584	984	0.893386	0.10834	0.52	HC	valid
GNA13	PRKACA	10672	5566	923.5	0.804735	0.0985584	0.52	MC	less_valid
CD247	GAB2	919	9846	957	0.851509	0.0658243	0.73	NaN	none
AKT1	SREBF1	207	6720	973	0.875858	0.0723847	NA	MC	less_valid
IRF3	IRF5	3661	3663	955	0.848559	0.111597	0.87	HC	valid
BUB1B	PPP1CC	701	5501	953	0.84563	0.00329597	NA	HC	valid
ATP6V0A1	ATP6V0D1	535	9114	949	0.839832	0.603572	NA	HC	valid
HGS	ITCH	9146	83737	1000	0.920066	0.182507	0.63	NaN	none
LCK	PRKCZ	3932	5590	998	0.916653	0.0592581	NA	HC	valid
CDC42	CTNNB1	998	1499	943.5	0.831991	0.10834	NA	MC	less_valid
ATP6V0A4	ATP6V1C1	50617	528	998	0.916653	0.57342	NA	HC	valid
PIK3CB	PRKCD	5291	5580	978	0.883744	0.150464	0.73	LC	less_valid
PEX5	PEX7	5830	5191	950	0.841274	0.392958	0.9	HC	valid
F10	PLAT	2159	5327	957	0.851509	0.269999	0.75	HC	valid
MAP3K5	NEDD4	4217	4734	983	0.891765	0.0985584	0.52	MC	less_valid
PTK2	PTPN1	5747	5770	983	0.891765	0.0854863	0.75	HC	valid
NEDD4	RAF1	4734	5894	1000	0.920066	0.300275	0.56	NaN	none
BIRC2	TRADD	329	8717	987	0.898281	0.0559731	0.52	HC	valid
RAF1	STK3	5894	6788	975	0.878996	0.395741	0.55	HC	valid
IGF1R	TP53	3480	7157	981.333	0.889077	0.188872	0.63	NaN	none
ATP6V1B2	GUSB	526	2990	956	0.850032	0.279141	0.55	NaN	none
PDPK1	RPS6KA1	5170	6195	967.5	0.867336	0.182507	0.65	HC	valid
DRD1	EPB41L2	1812	2037	999	0.918357	0.105082	0.73	NaN	none
FLNC	HSPB1	2318	3315	931	0.814728	0.607746	0.63	NaN	none
EGF	ITGB1	1950	3688	931.333	0.815179	0.118102	NA	LC	less_valid
MAP3K7	RUVBL1	6885	8607	1000	0.920066	0.160113	0.72	NaN	none
CLTC	PRKACA	1213	5566	971	0.872741	0.33582	0.63	LC	less_valid
PRKG1	VASP	5592	7408	1000	0.920066	0.144015	0.66	NaN	none
CCR7	CXCR6	1236	10663	953	0.84563	0.131081	NA	HC	valid
SOS1	SRC	6654	6714	925.75	0.807704	0.48588	0.7	HC	valid
GGA3	HGS	23163	9146	1000	0.920066	0.54858	0.63	HC	valid
AP1G1	AP4M1	164	9179	984	0.893386	0.300275	NA	HC	valid
JAK1	RAF1	3716	5894	982	0.89015	0.144015	0.73	HC	valid
ATP6V1A	ATP6V1C1	523	528	997	0.914955	0.297273	0.63	MC	less_valid
SRC	YES1	6714	7525	984	0.893386	0.0920263	NA	HC	valid
ERBB2	GHR	2064	2690	993	0.908218	0.229834	NA	HC	valid
ACVR2B	SMURF2	93	64750	989	0.901571	0.0395311	NA	HC	valid
F8	F9	2157	2158	956	0.850032	0.124596	0.62	HC	valid
SMPD1	TNFRSF1A	6609	7132	966	0.86504	0.220448	0.03	NaN	none
PIP5K1C	PIP5KL1	23396	138429	977	0.882156	0.398518	0.72	NaN	none
ASAH1	SMPD1	427	6609	973	0.875858	0.359004	0.52	NaN	none
HIF1A	TP53	3091	7157	937	0.822919	0.239178	0.89	NaN	none
BAD	PRKCI	572	5584	987	0.898281	0.239178	0.75	NaN	none
ADRA1B	TBXA2R	147	6915	994	0.909894	0.124596	NA	HC	valid
ABL1	STAT5B	25	6777	964	0.861997	0.229834	NA	HC	valid
GAB1	SRC	2549	6714	993	0.908218	0.147241	NA	HC	valid
ERBB3	RASA1	2065	5921	948	0.838395	0.153684	0.63	LC	less_valid
CD4	CXCR4	920	7852	995	0.911575	0.105082	0.83	NaN	none
GADD45G	MAP2K6	10912	5608	929	0.812037	0.309245	0.65	LC	less_valid
AGTR1	THOP1	185	7064	939	0.825688	0.101821	0.65	NaN	none
FLNC	SMURF2	2318	64750	970	0.87119	0.19522	0.63	HC	valid
MAP3K2	NEDD4L	10746	23327	950	0.841274	0.460301	0.52	HC	valid
LAMA5	LAMC1	3911	3915	971	0.872741	0.232954	0.71	HC	valid
CTSA	GLB1	5476	2720	922	0.802768	0.387369	0.52	NaN	none
SOD1	SOD2	6647	6648	997	0.914955	0.45509	NA	HC	valid
EP300	PPARGC1A	2033	10891	996	0.913262	0.0362399	0.63	MC	less_valid
CCR3	CCR8	1232	1237	958	0.852992	0.166529	NA	HC	valid
AGPS	GNPAT	8540	8443	946	0.835536	0.163323	0.79	NaN	none
ACVR2A	ACVR2B	92	93	980	0.886936	0.54858	NA	HC	valid
CLTC	HGS	1213	9146	999	0.918357	0.69808	0.96	MC	less_valid
MAP2K6	SMAD7	5608	4092	964	0.861997	0.124596	0.73	HC	valid
BCAR1	VCL	9564	7414	957	0.851509	0.288233	0.72	NaN	none
CXCL6	PPBP	6372	5473	978	0.883744	0.134319	NA	HC	valid
PIK3CA	RASGRP3	5290	25780	982	0.89015	0.303271	0.65	NaN	none
ACTN4	SPTAN1	81	6709	992	0.906548	0.0723847	NA	HC	valid
SMAD7	WWP1	4092	11059	926	0.808036	0.204713	0.63	NaN	none
DVL2	PRKCG	1856	5582	963.5	0.861239	0.0131832	0.52	HC	valid
IRAK1	PIN1	3654	5300	986	0.896644	0.223581	0.77	MC	less_valid
CHRM1	TRHR	1128	7201	943	0.831286	0.198389	NA	HC	valid
EPHB1	PIK3R1	2047	5295	931	0.814728	0.0789389	NA	HC	valid
GNA12	PRKCD	2768	5580	962	0.858975	0.153684	0.65	MC	less_valid
BLNK	FGR	29760	2268	991	0.904884	0.144015	NA	HC	valid
SRC	STAT5A	6714	6776	976	0.880574	0.251568	0.62	HC	valid
NCK1	SRC	4690	6714	1000	0.920066	0.251568	NA	HC	valid
YWHAE	YWHAQ	7531	10971	923	0.804078	0.0723847	0.84	HC	valid
AKT1	FRS2	207	10818	958	0.852992	0.0164784	NA	HC	valid
ATP6V0A1	ATP6V1C2	535	245973	993	0.908218	0.344564	NA	HC	valid
ADRB2	SRC	154	6714	972.5	0.875076	0.783632	0.89	HC	valid
MAP2K5	PRKCI	5607	5584	928	0.810699	0.279141	0.62	HC	valid
CALM3	TRAF6	808	7189	928	0.810699	0.0985584	0.72	NaN	none
CLTC	GGA1	1213	26088	997	0.914955	0.611887	0.82	MC	less_valid
HCK	VAV2	3055	7410	941	0.828477	0.046111	NA	HC	valid
CDK2	DBF4	1017	10926	959	0.85448	0.0658243	NA	LC	less_valid
IKBKB	LTBR	3551	4055	928	0.810699	0.163323	NA	HC	valid
ARRB1	CLTC	408	1213	986	0.896644	0.376107	0.75	NaN	none
BIRC3	RIPK3	330	11035	940	0.82708	0.12784	0.75	HC	valid
PLG	SERPING1	5340	710	995	0.911575	0.21102	0.52	HC	valid
CTSD	PSAP	1509	5660	994	0.909894	0.781075	0.84	HC	valid
EEA1	RABEP1	8411	9135	1000	0.920066	0.285208	0.52	NaN	none
MAP3K12	MAPK8IP1	7786	9479	1000	0.920066	0.223581	0.85	LC	less_valid
EGF	LAMB1	1950	3912	1000	0.920066	0.131081	NA	HC	valid
ITGB2	SYK	3689	6850	922	0.802768	0.0985584	0.86	NaN	none
GSTK1	RPS6KA3	373156	6197	993	0.908218	0.392958	0.63	LC	less_valid
FLNB	FLNC	2317	2318	939.5	0.826384	0.390167	0.63	HC	valid
CREBBP	MYH9	1387	4627	922	0.802768	0.0559731	0.63	NaN	none
CD81	ITGA4	975	3676	942	0.829879	0.242283	0.73	NaN	none
FADD	RIPK2	8772	8767	987	0.898281	0.150464	NA	HC	valid
CALM3	RIPK2	808	8767	936	0.821542	0.276099	0.72	NaN	none
IL13	VCAM1	3596	7412	974	0.877424	0.0723847	0.52	NaN	none
AP1M1	EHD2	8907	30846	984	0.893386	0.392958	0.52	NaN	none
IKBKG	PRKDC	8517	5591	955	0.848559	0.0789389	0.72	NaN	none
SH3GL1	SRC	6455	6714	961	0.857471	0.503306	NA	HC	valid
AP2B1	STAM2	163	10254	994	0.909894	0.468058	NA	HC	valid
ABL1	ATM	25	472	998	0.916653	0.144015	0.9	NaN	none
EGF	RPS6KA5	1950	9252	998	0.916653	0.364732	NA	HC	valid
MAP3K7	MAPK8IP1	6885	9479	988	0.899923	0.12135	0.82	LC	less_valid
CRK	RET	1398	5979	946	0.835536	0.285208	0.85	LC	less_valid
INADL	PARD6A	10207	50855	1000	0.920066	0.176127	0.68	HC	valid
CARD8	CASP5	22900	838	948	0.838395	0.327018	NA	HC	valid
BDKRB1	CCL19	623	6363	935	0.820169	0.0691052	NA	HC	valid
EGF	INSR	1950	3643	994	0.909894	0.111597	NA	HC	valid
LCK	PRKCD	3932	5580	922	0.802768	0	0.52	HC	valid
BCAR1	LCK	9564	3932	966	0.86504	0.0789389	0.85	HC	valid
PIK3CA	STK11	5290	6794	945.5	0.834825	0.294266	NA	LC	less_valid
CD38	CD9	952	928	992	0.906548	0.101821	0.52	NaN	none
HIF1A	ID2	3091	3398	991	0.904884	0.423172	NA	HC	valid
ATP6V1F	TCIRG1	9296	10312	927	0.809365	0.12784	NA	HC	valid
ABL2	ERBB3	27	2065	977	0.882156	0.169732	0.63	HC	valid
PIAS1	PTK2	8554	5747	922	0.802768	0.0230678	0.67	NaN	none
TNFRSF1A	TNFSF10	7132	8743	993	0.908218	0.0625419	NA	HC	valid
DGKA	IL21	1606	59067	993	0.908218	0.11485	0.52	NaN	none
MAP3K8	TRAF2	1326	7186	924	0.805392	0.353248	0.8	HC	valid
BAD	WASF1	572	8936	1000	0.920066	0.105082	0.59	NaN	none
SRC	STAT1	6714	6772	1000	0.920066	0.341656	0.84	HC	valid
PRKCD	RASGRP3	5580	25780	977	0.882156	0.276099	0.77	HC	valid
GNA12	PPP5C	2768	5536	984	0.893386	0.0428215	0.86	NaN	none
IGF1R	YWHAG	3480	7532	935	0.820169	0.046111	0.88	NaN	none
ACOX2	EHHADH	8309	1962	966	0.86504	0.384565	NA	LC	less_valid
MAP3K5	YWHAG	4217	7532	955	0.848559	0.0789389	0.63	HC	valid
IRAK3	TRAF6	11213	7189	964	0.861997	0.0428215	0.83	HC	valid
CHMP4B	CHMP6	128866	79643	998	0.916653	0.783632	0.84	MC	less_valid
ADRBK1	PIK3CG	156	5294	988	0.899923	0.12135	0.52	LC	less_valid
CCL25	CXCL3	6370	2921	935	0.820169	0.207869	NA	HC	valid
CCR1	CCR7	1230	1236	973	0.875858	0.12784	NA	HC	valid
CAV1	DNM1	857	1759	1000	0.920066	0.68606	0.52	NaN	none
LYN	PLCG2	4067	5336	943.5	0.831991	0.294266	0.89	HC	valid
HSP90AA1	ZAP70	3320	7535	991	0.904884	0.124596	0.63	NaN	none
CALM3	TRAF2	808	7186	957	0.851509	0.288233	0.72	NaN	none
MAP3K5	TRAF6	4217	7189	961	0.857471	0.118102	0.85	HC	valid
FGF2	FLT1	2247	2321	976	0.880574	0.701444	NA	LC	less_valid
ITGB4	SMAD3	3691	4088	965	0.863516	0.111597	0.63	NaN	none
ATF2	MAP2K6	1386	5608	930	0.81338	0.321119	NA	HC	valid
PIK3R1	TUBA1B	5295	10376	956	0.850032	0.1569	0.79	NaN	none
ARRB2	TUBA4A	409	7277	1000	0.920066	0.367586	0.63	NaN	none
AP2B1	ARRB1	163	408	969	0.869645	0.282177	0.65	NaN	none
CLTC	IKBKG	1213	8517	980	0.886936	0.263876	0.72	NaN	none
ABL1	INPPL1	25	3636	926	0.808036	0.172931	0.74	HC	valid
RPS6KA3	SRF	6197	6722	929	0.812037	0.376107	NA	LC	less_valid
PRKCG	PTK2B	5582	2185	948.667	0.839352	0.33582	NA	HC	valid
PTGER1	TACR1	5731	6869	999	0.918357	0.12784	NA	HC	valid
CASP10	CASP9	843	842	991	0.904884	0.0691052	0.67	HC	valid
ATP6V0C	ATP6V1A	527	523	975	0.878996	0.288233	NA	LC	less_valid
CSF1R	SOCS1	1436	8651	933	0.817439	-0.0395311	0.95	HC	valid
BLNK	ZAP70	29760	7535	964	0.861997	0.176127	NA	HC	valid
GSK3B	MDM2	2932	4193	999	0.918357	0.0985584	NA	LC	less_valid
FGB	PIK3R3	2244	8503	999	0.918357	0.176127	0.63	NaN	none
ATP6V0A4	ATP6V1E2	50617	90423	924	0.805392	0.0985584	NA	HC	valid
F8	PLAT	2157	5327	932	0.816081	0.0526868	NA	HC	valid
GNG11	GNG2	2791	54331	999	0.918357	0.19522	NA	HC	valid
COL1A2	COL5A3	1278	50509	1000	0.920066	0.0920263	0.63	NaN	none
CCL22	CCL5	6367	6352	924	0.805392	0.1569	NA	HC	valid
GIT1	GRK5	28964	2869	975	0.878996	0.260807	0.52	LC	less_valid
FGR	HSP90AA1	2268	3320	943	0.831286	0.0952934	0.49	LC	less_valid
CD4	TNFRSF10A	920	8797	978	0.883744	0.1569	0.62	NaN	none
GSK3B	PMAIP1	2932	5366	980	0.886936	0.00329597	0.63	NaN	none
IL7R	PTPRC	3575	5788	942	0.829879	0.0559731	NA	HC	valid
CDC7	CDK2	8317	1017	921	0.801463	0	0.52	HC	valid
CLTC	EPN1	1213	29924	956	0.850032	0.254653	0.8	NaN	none
CDC25A	SMAD3	993	4088	985	0.895012	0.0592581	0.75	NaN	none
IL1R2	NFKB1	7850	4790	979	0.885338	0.41502	NA	HC	valid
HSP90AA1	RIPK3	3320	11035	993	0.908218	0.163323	0.72	HC	valid
CD4	CXCL12	920	6387	928	0.810699	0.0854863	0.52	NaN	none
FGFR1	VEGFA	2260	7422	928	0.810699	0.10834	NA	LC	less_valid
MCM7	RB1	4176	5925	935	0.820169	-0.0197733	0.9	NaN	none
MAP3K8	NFKB2	1326	4791	995	0.911575	0.201553	0.78	HC	valid
NEDD4L	TGFBR2	23327	7048	972	0.874296	0.150464	NA	HC	valid
ATP6V1C2	ATP6V1E1	245973	529	995	0.911575	0.294266	NA	MC	less_valid
MAPK8IP3	RAF1	23162	5894	999	0.918357	0.431255	0.88	NaN	none
ASAH1	ATP6V1B2	427	526	995	0.911575	0.294266	0.55	NaN	none
ITGA9	ITGB8	3680	3696	965.5	0.864277	0.0296551	NA	HC	valid
GGA3	RAB5A	23163	5868	959	0.85448	0.401286	0.63	NaN	none
EGF	LAMC2	1950	3918	966	0.86504	0.176127	NA	HC	valid
BIRC2	TRAF2	329	7186	925.5	0.807373	0.0985584	0.97	MC	less_valid
MYC	STK11	4609	6794	972	0.874296	0.153684	NA	MC	less_valid
MAPK3	PPARA	5595	5465	939	0.825688	0.0756626	0.52	HC	valid
ARRB1	HGS	408	9146	967	0.86657	0.332893	0.63	NaN	none
BAD	STEAP3	572	55240	933	0.817439	0.137554	0.63	NaN	none
AP2A1	CLTC	160	1213	995	0.911575	0.59085	NA	MC	less_valid
COL1A2	FN1	1278	2335	997	0.914955	0.101821	0.52	LC	less_valid
GADD45B	MAP2K6	4616	5608	1000	0.920066	0.223581	0.65	LC	less_valid
TANK	TICAM1	10010	148022	978	0.883744	0.404048	0.63	NaN	none
ATP1A3	ATP1A4	478	480	990	0.903225	0.0428215	NA	HC	valid
CASP3	RET	836	5979	934	0.818802	0.163323	0.68	NaN	none
ACTN4	FLNB	81	2317	976	0.880574	0.150464	0.63	HC	valid
CDKN1B	TSC1	1027	7248	1000	0.920066	0.153684	0.72	NaN	none
PRKDC	TNFRSF1A	5591	7132	954	0.847092	0.101821	0.72	NaN	none
GIT1	SRC	28964	6714	990	0.903225	0.384565	0.55	HC	valid
CASP1	RIPK2	834	8767	920	0.800162	0.140786	0.77	HC	valid
AGTR1	BDKRB1	185	623	976	0.880574	-0.00659186	NA	HC	valid
GGA1	IGF2R	26088	3482	986	0.896644	0.436605	0.86	NaN	none
BCAR1	RAPGEF1	9564	2889	971	0.872741	0.251568	0.79	HC	valid
FGFR3	HSPA8	2261	3312	997	0.914955	0.147241	0.63	NaN	none
ACTN1	SRC	87	6714	995	0.911575	0.26694	0.76	HC	valid
CHEK2	PPP2R5A	11200	5525	923	0.804078	-0.00988761	0.71	NaN	none
APC	CSNK1A1	324	1452	926	0.808036	0.214167	0.65	HC	valid
MYC	XDH	4609	7498	990	0.903225	0.144015	0.63	NaN	none
ABL1	LRP2	25	4036	998	0.916653	0.0920263	0.63	LC	less_valid
CDKN1A	STAT3	1026	6774	988	0.899923	0.0985584	0.83	NaN	none
HGS	PAK1	9146	5058	992	0.906548	0.26694	0.85	NaN	none
GRIN1	RPS6KA3	2902	6197	979	0.885338	0.160113	0.59	HC	valid
HSP90AA1	PDPK1	3320	5170	922	0.802768	0.163323	0.71	HC	valid
CD247	LCK	919	3932	928	0.810699	0.0559731	0.84	NaN	none
AP2B1	ARF6	163	382	993	0.908218	0.303271	NA	HC	valid
IL8	PF4	3576	5196	945	0.834114	0.0723847	0.65	HC	valid
CREBBP	SREBF1	1387	6720	959	0.85448	0.169732	0.89	MC	less_valid
IL15	IL2RG	3600	3561	995	0.911575	0.163323	0.88	LC	less_valid
NTRK2	PIK3R1	4915	5295	967	0.86657	0.1569	0.63	LC	less_valid
CCL17	CX3CL1	6361	6376	927	0.809365	0.150464	NA	HC	valid
ITGAV	ITGB1	3685	3688	950.333	0.841755	0.131081	0.66	HC	valid
MYC	TUBB	4609	203068	996	0.913262	0.0691052	0.63	NaN	none
CCR1	CCR8	1230	1237	1000	0.920066	0.176127	NA	HC	valid
AKT1	CDH1	207	999	953	0.84563	0.0985584	NA	LC	less_valid
MAP2K4	PRKCD	6416	5580	940.5	0.827778	0.0887573	NA	HC	valid
COL1A1	COL1A2	1277	1278	1000	0.920066	0.431255	0.52	LC	less_valid
KIT	NF1	3815	4763	965	0.863516	0.131081	NA	LC	less_valid
HSPA4	MAP2K4	3308	6416	925	0.806712	0.0854863	NA	HC	valid
FGF2	THBS1	2247	7057	994	0.909894	0.248478	0.56	NaN	none
GHR	IL6	2690	3569	987	0.898281	0.101821	NA	LC	less_valid
GSK3B	SMAD1	2932	4086	999	0.918357	0.144015	0.68	HC	valid
CCL24	IL8	6369	3576	988	0.899923	0.214167	NA	HC	valid
HTR6	LHCGR	3362	3973	954	0.847092	0.318159	NA	HC	valid
KRAS	RET	3845	5979	990	0.903225	0.160113	NA	MC	less_valid
PPP2CB	PPP2R5A	5516	5525	931	0.814728	0.166529	NA	LC	less_valid
BDKRB1	CCL5	623	6352	924	0.805392	0.105082	NA	HC	valid
CDK5	GSK3B	1020	2932	964	0.861997	0.0329479	0.52	HC	valid
CD40	TRADD	958	8717	976	0.880574	0.0887573	NA	HC	valid
PPP1R12A	PTPRJ	4659	5795	947	0.836963	0.0789389	0.68	NaN	none
BCAR1	PRKCH	9564	5583	991	0.904884	0.00988761	NA	HC	valid
CRK	MET	1398	4233	978	0.883744	0.329959	NA	LC	less_valid
PPP3CA	SOD1	5530	6647	994	0.909894	0.153684	0.68	NaN	none
MAP3K7	PPP5C	6885	5536	956	0.850032	0.0789389	0.63	NaN	none
RAPGEF1	RRAS2	2889	22800	974	0.877424	0.169732	0.52	HC	valid
AP2B1	TGFBR1	163	7046	1000	0.920066	0.536956	0.84	NaN	none
EGF	ITGB4	1950	3691	934	0.818802	0.124596	NA	HC	valid
EHD1	EHD3	10938	30845	1000	0.920066	0.392958	0.85	MC	less_valid
PML	TGFBR1	5371	7046	987	0.898281	0.245383	0.52	NaN	none
PRKG1	SMAD4	5592	4089	996	0.913262	0.101821	0.63	HC	valid
GAB1	ROCK1	2549	6093	939	0.825688	0.0131832	0.78	HC	valid
AP1B1	AP1M2	162	10053	969	0.869645	0.588701	0.61	HC	valid
CD79A	DAPP1	973	27071	947	0.836963	0.11485	NA	HC	valid
HSPA8	NFKBIE	3312	4794	951	0.842721	0.0592581	0.63	NaN	none
PRKAA2	SREBF1	5563	6720	923	0.804078	0.0263617	NA	MC	less_valid
F9	GP1BA	2158	2811	986	0.896644	0.124596	NA	HC	valid
ATP6V0D1	ATP6V1E2	9114	90423	949	0.839832	0.172931	NA	HC	valid
ATP6V1B2	CTSG	526	1511	920	0.800162	0.172931	0.55	NaN	none
RIPK3	SCIN	11035	85477	957	0.851509	0.10834	0.72	LC	less_valid
CHEK2	PPM1D	11200	8493	994	0.909894	0.131081	NA	HC	valid
DVL3	PLN	1857	5350	1000	0.920066	0.0887573	0.49	NaN	none
ITGB3	PDPK1	3690	5170	935	0.820169	0.188872	0.52	NaN	none
MCM7	PPP1CA	4176	5499	938	0.824301	0.00988761	0.56	NaN	none
CCND1	MAPK12	595	6300	947.5	0.837678	0.0691052	NA	HC	valid
EPHA1	FYN	2041	2534	970	0.87119	0.0658243	NA	HC	valid
MDM2	SMURF1	4193	57154	952	0.844173	0.294266	0.68	LC	less_valid
AP2A1	STAM2	160	10254	998	0.916653	0.406802	NA	HC	valid
FGR	PLCG1	2268	5335	940	0.82708	0.169732	NA	HC	valid
NEDD4	PDGFRB	4734	5159	924	0.805392	0.0691052	0.59	NaN	none
IGF1R	YWHAE	3480	7531	952.5	0.844901	0.0592581	0.78	NaN	none
AP2A1	AP2M1	160	1173	986	0.896644	0.475744	NA	HC	valid
HSPA4	RELA	3308	5970	989	0.901571	-0.00659186	0.75	LC	less_valid
PRKACA	PTPN7	5566	5778	980	0.886936	0.140786	0.52	HC	valid
ATP6V0C	PDGFRB	527	5159	928	0.810699	0.0263617	0.63	NaN	none
BAIAP2	INADL	10458	10207	1000	0.920066	0.124596	NA	LC	less_valid
BIRC3	CD40	330	958	920	0.800162	0.11485	0.52	NaN	none
MAP3K5	NEDD4L	4217	23327	979	0.885338	0.248478	0.52	HC	valid
EEA1	MAPK14	8411	1432	943	0.831286	0.150464	0.55	NaN	none
LCK	PLD2	3932	5338	978	0.883744	0.101821	0.52	HC	valid
EGF	FYN	1950	2534	993	0.908218	0.118102	NA	LC	less_valid
BTK	CBL	695	867	994	0.909894	0.0526868	0.85	HC	valid
CASP3	MAPK8IP3	836	23162	974	0.877424	0.232954	0.52	NaN	none
EPHB2	LCK	2048	3932	925	0.806712	0.00329597	NA	HC	valid
ITGA3	ITGB4	3675	3691	952	0.844173	0.105082	0.63	NaN	none
CRKL	GRAP2	1399	9402	938	0.824301	0.0164784	NA	HC	valid
AP2B1	CLTC	163	1213	977	0.882156	0.624109	NA	MC	less_valid
MET	SRC	4233	6714	968	0.868105	0.468058	0.86	HC	valid
ACADM	EHHADH	34	1962	1000	0.920066	0.207869	NA	LC	less_valid
BCL10	NLRC4	8915	58484	961	0.857471	0.269999	0.74	HC	valid
VPS28	VPS37C	51160	55048	974	0.877424	0.364732	0.75	LC	less_valid
CSNK1D	ULK2	1453	9706	953	0.84563	0.188872	0.63	HC	valid
KIT	LCK	3815	3932	972	0.874296	0.0756626	0.73	HC	valid
MAP3K5	MAP3K6	4217	9064	968	0.868105	0.124596	0.88	HC	valid
EGF	YES1	1950	7525	993	0.908218	0.105082	NA	LC	less_valid
ACTN4	CDH1	81	999	1000	0.920066	0.0395311	0.75	NaN	none
TBK1	TNFAIP3	29110	7128	990	0.903225	0.12135	0.72	NaN	none
MAP3K12	MAPK8IP2	7786	23542	1000	0.920066	0.431255	0.78	LC	less_valid
EPHB3	FYN	2049	2534	934	0.818802	0.0559731	0.88	HC	valid
GNAO1	MAPK14	2775	1432	959.5	0.855226	0.0395311	NA	MC	less_valid
ATP6V1C1	ATP6V1H	528	51606	993	0.908218	0.562255	NA	MC	less_valid
MAP3K2	MAP3K5	10746	4217	986	0.896644	0.131081	0.71	HC	valid
HGS	SOS1	9146	6654	1000	0.920066	0.232954	NA	HC	valid
FASN	MAPK13	2194	5603	941	0.828477	0.0493994	0.63	MC	less_valid
RAF1	SRC	5894	6714	941.25	0.828827	0.699766	0.9	HC	valid
APC	TCF7L2	324	6934	1000	0.920066	0.263876	NA	LC	less_valid
AP3D1	AP3S1	8943	1176	998	0.916653	0.315194	0.72	HC	valid
FLT4	ITGA5	2324	3678	994	0.909894	-0.0428215	0.52	NaN	none
CACNA1D	FGFR2	776	2263	994	0.909894	0.356129	0.52	NaN	none
PDGFRB	PIK3C2B	5159	5287	945	0.834114	0.300275	0.67	NaN	none
NOS1	PTPN6	4842	5777	990	0.903225	-0.160113	0.74	HC	valid
BDKRB1	CCR1	623	1230	954	0.847092	0.169732	NA	HC	valid
PRKDC	TRADD	5591	8717	999	0.918357	0.0854863	0.72	NaN	none
FARP2	TLN1	9855	7094	960	0.855973	0.131081	NA	HC	valid
AP1G1	CLTC	164	1213	992	0.906548	0.641884	0.59	MC	less_valid
MAPKAPK5	TP53	8550	7157	993	0.908218	0.338741	0.76	HC	valid
PRKACA	PTPRR	5566	5801	974	0.877424	0.163323	0.52	HC	valid
MAP3K1	MAP3K11	4214	4296	938	0.824301	0.297273	NA	HC	valid
MAP3K12	MAPK14	7786	1432	966	0.86504	0.101821	NA	HC	valid
CD8B	ZAP70	926	7535	937	0.822919	0.147241	NA	HC	valid
FGG	ITGAM	2266	3684	923	0.804078	0.0789389	0.62	NaN	none
CREB1	EP300	1385	2033	971	0.872741	-0.00988761	0.95	MC	less_valid
EPN1	HGS	29924	9146	998	0.916653	0.201553	NA	HC	valid
PPM1A	SMAD3	5494	4088	928	0.810699	0.204713	0.55	NaN	none
FGFR2	PIK3R3	2263	8503	942	0.829879	0.166529	NA	LC	less_valid
IL1R1	TLR3	3554	7098	934	0.818802	0.0789389	NA	HC	valid
CLTC	RELB	1213	5971	996	0.913262	0.624109	0.72	NaN	none
CD40	TRAF2	958	7186	955	0.848559	0.137554	0.97	HC	valid
NFKB2	TUBB	4791	203068	970	0.87119	0.144015	0.72	NaN	none
ATM	SMC3	472	9126	970	0.87119	0.0887573	0.72	NaN	none
CAMK2A	ITPKA	815	3706	987	0.898281	0.257733	0.52	NaN	none
BMPR1B	SMAD6	658	4091	999	0.918357	0.22671	0.59	HC	valid
RASA1	SRC	5921	6714	983	0.891765	0.26694	0.88	HC	valid
ATP6V1C1	ATP6V1E2	528	90423	996	0.913262	0.26694	NA	MC	less_valid
ARRB1	PPM1B	408	5495	984	0.893386	0.312222	0.63	NaN	none
CCR3	CXCR6	1232	10663	920	0.800162	0.118102	NA	HC	valid
CLTC	MAP3K7	1213	6885	940	0.82708	0.35036	0.72	NaN	none
ACTG1	TRADD	71	8717	993	0.908218	0.0920263	0.72	NaN	none
SMAD1	SMAD3	4086	4088	927	0.809365	0.0395311	0.52	HC	valid
ERBB3	NCK1	2065	4690	969	0.869645	0.176127	0.63	LC	less_valid
ABL1	JAK1	25	3716	962.5	0.859728	0.282177	0.85	HC	valid
CBL	SH3GL3	867	6457	960	0.855973	0.223581	0.82	MC	less_valid
CCR1	GNG2	1230	54331	935	0.820169	0.169732	NA	HC	valid
RRAS	YES1	6237	7525	927	0.809365	0.134319	NA	HC	valid
C3	CTSG	718	1511	980	0.886936	0.367586	0.52	NaN	none
E2F1	YWHAQ	1869	10971	945	0.834114	0.0197733	0.75	NaN	none
RAPGEF1	SRC	2889	6714	956.5	0.85077	0.505763	0.63	HC	valid
FASN	PRKAA2	2194	5563	946	0.835536	0.0493994	NA	MC	less_valid
DNM1	SH3GL1	1759	6455	985	0.895012	0.373274	0.95	HC	valid
ACADM	CALM3	34	808	990	0.903225	0.223581	0.56	NaN	none
CANX	SMURF2	821	64750	992	0.906548	0.169732	0.63	NaN	none
ADRB3	SRC	155	6714	999.5	0.919211	0.439269	0.85	HC	valid
BCAR1	TUBA4A	9564	7277	942	0.829879	0.137554	0.63	NaN	none
HSP90AA1	PPARA	3320	5465	992	0.906548	0.0985584	0.88	LC	less_valid
EEA1	IGF2R	8411	3482	1000	0.920066	0.332893	0.55	NaN	none
CD28	PLCG1	940	5335	981	0.888541	0.140786	0.52	HC	valid
PEX12	PEX5	5193	5830	994	0.909894	0.285208	0.9	NaN	none
PRKAA1	ULK2	5562	9706	996	0.913262	0.0526868	0.63	HC	valid
CD28	PTPRC	940	5788	959	0.85448	0.0395311	0.52	NaN	none
BIRC3	TRADD	330	8717	993	0.908218	0.204713	NA	HC	valid
AP2A1	TRAF6	160	7189	987	0.898281	0.33582	0.63	NaN	none
SMURF1	SMURF2	57154	64750	971.5	0.873518	0.315194	0.72	HC	valid
ARRB1	NEDD4	408	4734	977	0.882156	0.312222	0.72	MC	less_valid
ERBB3	NCK2	2065	8440	986	0.896644	0.26694	0.63	LC	less_valid
ITGAV	TGFB1	3685	7040	994	0.909894	0.356129	0.52	NaN	none
HCK	SYK	3055	6850	965	0.863516	0.137554	NA	HC	valid
FOS	GLB1	2353	2720	998	0.916653	0.251568	0.49	NaN	none
DNM1	SH3GLB1	1759	51100	921	0.801463	0.425874	0.81	HC	valid
GRK7	NEDD4	131890	4734	997	0.914955	0.236068	0.52	MC	less_valid
LAMA3	LAMC1	3909	3915	956	0.850032	0.0296551	0.52	HC	valid
RAPGEF1	YES1	2889	7525	930	0.81338	0.163323	NA	HC	valid
COL5A1	FN1	1289	2335	932	0.816081	0.101821	NA	LC	less_valid
ACTB	CBL	60	867	951.5	0.843446	0.282177	0.63	LC	less_valid
AP2B1	PIP5K1C	163	23396	999	0.918357	0.433934	0.62	NaN	none
IGF1R	PLCG2	3480	5336	941	0.828477	0.245383	NA	HC	valid
ATP6V1B2	ATP6V1C1	526	528	997	0.914955	0.364732	NA	MC	less_valid
AP1B1	AP2M1	162	1173	996	0.913262	0.532248	0.63	HC	valid
AP2B1	ARRB2	163	409	1000	0.920066	0.603572	0.89	NaN	none
CHEK2	PPP2R5B	11200	5526	967	0.86657	0.153684	0.71	NaN	none
CREBBP	PPARD	1387	5467	928.5	0.811367	0.147241	NA	LC	less_valid
ACTN1	SPTAN1	87	6709	996	0.913262	0.0723847	NA	HC	valid
ABL1	P2RX7	25	5027	928	0.810699	0.0625419	0.63	NaN	none
CAMK2B	JAK1	816	3716	934	0.818802	0.185691	NA	HC	valid
HCK	PLCG1	3055	5335	977	0.882156	0.236068	0.66	HC	valid
ATP6V1C2	ATP6V1G3	245973	127124	922	0.802768	0.370434	NA	LC	less_valid
PIK3CA	YWHAH	5290	7533	936.5	0.82223	-0.0131832	0.72	LC	less_valid
PEX6	PEX7	5190	5191	993	0.908218	0.318159	NA	MC	less_valid
MAPK3	TNFSF10	5595	8743	937.5	0.823609	0.160113	NA	LC	less_valid
CLTC	HSPA8	1213	3312	928	0.810699	0.229834	NA	MC	less_valid
HIF1A	MAPK3	3091	5595	949	0.839832	0.236068	0.55	HC	valid
CSF2	EPOR	1437	2057	938	0.824301	0.327018	NA	LC	less_valid
CALR	ITGAV	811	3685	976	0.880574	0.182507	0.67	NaN	none
HGF	HRAS	3082	3265	960	0.855973	0.0658243	NA	LC	less_valid
EPB41L2	SPTAN1	2037	6709	947	0.836963	0.1569	0.62	NaN	none
PPP2R1A	TRADD	5518	8717	996	0.913262	0.0131832	0.73	NaN	none
CCR1	CXCR6	1230	10663	958	0.852992	0.19522	NA	HC	valid
CHMP6	USP8	79643	9101	973	0.875858	0.566746	0.56	NaN	none
AKT1	GIT1	207	28964	961	0.857471	0.207869	NA	HC	valid
AP1G1	AP2M1	164	1173	991	0.904884	0.553172	0.72	HC	valid
AKT3	NEDD4	10000	4734	996	0.913262	0.147241	0.59	MC	less_valid
BMP4	MAP3K7	652	6885	984	0.893386	0.279141	NA	LC	less_valid
NEDD4L	TGFBR1	23327	7046	963	0.860483	0.520333	NA	HC	valid
CXCL3	IL8	2921	3576	971	0.872741	0.520333	NA	HC	valid
CLTC	GGA3	1213	23163	973	0.875858	0.575628	0.82	MC	less_valid
AP1M2	EPN1	10053	29924	932	0.816081	0.137554	0.63	NaN	none
COL1A1	PAK1	1277	5058	996	0.913262	0.105082	0.52	NaN	none
MKNK1	PLA2G4A	8569	5321	977	0.882156	0.124596	0.66	HC	valid
ACTG1	FLNC	71	2318	961.5	0.858222	0.245383	0.63	MC	less_valid
ILK	ITGB3	3611	3690	934	0.818802	0.185691	0.73	NaN	none
FLT4	FN1	2324	2335	981	0.888541	0.144015	NA	LC	less_valid
AURKA	TP53	6790	7157	980	0.886936	0.101821	0.9	HC	valid
NKD1	PPP2CA	85407	5515	974	0.877424	0.0428215	0.73	NaN	none
ITGB1	LYN	3688	4067	929	0.812037	0.124596	0.65	NaN	none
FIGF	ITGA9	2277	3680	978	0.883744	0.0559731	0.55	NaN	none
BCL2L1	RAF1	598	5894	930	0.81338	0.11485	0.75	LC	less_valid
ARRB1	HCK	408	3055	940	0.82708	-0.00329597	0.52	NaN	none
KIT	TEC	3815	100124696	970	0.87119	0.220448	0.88	HC	valid
NFKBIA	PTPN1	4792	5770	984	0.893386	0.046111	0.7	NaN	none
IKBKB	TSC1	3551	7248	920	0.800162	0.0592581	0.75	NaN	none
ITGAL	PTPRC	3683	5788	994	0.909894	0.0197733	0.71	HC	valid
ACTB	SPTAN1	60	6709	990	0.903225	0.185691	0.52	MC	less_valid
COL1A2	VWF	1278	7450	930	0.81338	0.182507	0.52	LC	less_valid
IKBKG	MCM7	8517	4176	984	0.893386	0.00659186	0.84	NaN	none
BIRC3	TRAF2	330	7186	959	0.85448	0.172931	0.97	MC	less_valid
MAP2K4	MAP3K12	6416	7786	962	0.858975	-0.00329597	0.52	HC	valid
FRS2	PTPN11	10818	5781	950	0.841274	0.0526868	0.9	HC	valid
HSP90AA1	MAP3K1	3320	4214	924.5	0.806052	0.251568	0.72	HC	valid
CDC42	OCRL	998	4952	985	0.895012	0.160113	0.52	HC	valid
EPOR	STAT5A	2057	6776	963	0.860483	0.0592581	0.95	HC	valid
SHC2	SRC	25759	6714	980.333	0.887471	0.490899	NA	HC	valid
JAK3	SYK	3718	6850	942	0.829879	0.0723847	NA	HC	valid
IRF7	MYD88	3665	4615	926	0.808036	0.124596	0.94	NaN	none
RELB	TUBB	5971	203068	991	0.904884	0.285208	0.72	NaN	none
AKT1	FGF1	207	2246	977	0.882156	0.0625419	NA	LC	less_valid
AXIN1	SMAD3	8312	4088	999	0.918357	0.0920263	0.59	NaN	none
MAP3K7	STAT3	6885	6774	957	0.851509	0.10834	0.8	LC	less_valid
CDK4	EGF	1019	1950	1000	0.920066	0.0658243	NA	HC	valid
F9	GP9	2158	2815	958	0.852992	0.291252	NA	HC	valid
DAPP1	PIK3R1	27071	5295	962	0.858975	0.176127	NA	HC	valid
ATP2B4	NOS1	493	4842	1000	0.920066	0.204713	0.62	LC	less_valid
JAK1	PTK2B	3716	2185	960	0.855973	0.291252	0.74	HC	valid
FLNC	RASA1	2318	5921	980	0.886936	0.192048	0.63	HC	valid
CD4	FYN	920	2534	984	0.893386	0.0592581	NA	HC	valid
ITGB2	KNG1	3689	3827	938	0.824301	0.179319	0.76	NaN	none
DDIT3	JUND	1649	3727	923	0.804078	0.251568	0.79	NaN	none
HCK	KIT	3055	3815	967	0.86657	0.26694	0.52	HC	valid
HGS	HSPA8	9146	3312	981	0.888541	0.147241	0.75	NaN	none
EGF	INSRR	1950	3645	932	0.816081	0.0263617	NA	HC	valid
IRF7	TANK	3665	10010	982	0.89015	0.0789389	0.76	NaN	none
CDC14A	TP53	8556	7157	999	0.918357	-0.111597	0.89	NaN	none
MAPK3	STAT3	5595	6774	920.667	0.801029	-0.00659186	0.66	HC	valid
ATM	ATR	472	545	998	0.916653	0.046111	0.75	NaN	none
PDGFRB	PRKCD	5159	5580	989	0.901571	0.046111	NA	HC	valid
AP1G1	AP3S1	164	1176	1000	0.920066	0.645743	NA	HC	valid
TBK1	TICAM1	29110	148022	970	0.87119	0.172931	0.84	NaN	none
CCL22	PPBP	6367	5473	992	0.906548	0.166529	NA	HC	valid
ATP6V1C1	ATP6V1G3	528	127124	981	0.888541	0.392958	NA	LC	less_valid
ACTB	MYC	60	4609	995	0.911575	0.338741	0.55	NaN	none
BCAR1	SYK	9564	6850	949	0.839832	0.0723847	NA	HC	valid
CCL17	IL8	6361	3576	934	0.818802	0.35036	NA	HC	valid
AKT1	NGFR	207	4804	953	0.84563	0.0296551	NA	HC	valid
CD34	PRKCD	947	5580	945	0.834114	0.111597	0.55	NaN	none
P2RX4	WNT4	5025	54361	1000	0.920066	0.172931	0.49	NaN	none
CCR1	CD14	1230	929	967	0.86657	0.105082	NA	HC	valid
HCLS1	SRC	3059	6714	937	0.822919	0.11485	NA	HC	valid
COL5A1	THBS1	1289	7057	1000	0.920066	0.19522	0.86	LC	less_valid
CYLD	TBK1	1540	29110	948	0.838395	0.0920263	0.76	MC	less_valid
BDKRB2	HTR2C	624	3358	992	0.906548	0.188872	NA	HC	valid
FOS	PPM1B	2353	5495	993	0.908218	0.318159	0.49	NaN	none
VPS24	VPS4A	51652	27183	938	0.824301	0.279141	0.63	NaN	none
HSP90AA1	IRAK1	3320	3654	988	0.899923	0.248478	0.52	HC	valid
PRKCD	RELA	5580	5970	943.667	0.832227	0.318159	NA	HC	valid
GSK3B	SREBF1	2932	6720	941	0.828477	0.0756626	0.52	MC	less_valid
SRC	STAT5B	6714	6777	992	0.906548	0.248478	0.55	HC	valid
NFKB1	VCAM1	4790	7412	975	0.878996	0.124596	NA	HC	valid
HSPA8	RIPK2	3312	8767	956	0.850032	0.0756626	0.72	HC	valid
CYC1	UQCRFS1	1537	7386	970	0.87119	-0.0164784	0.75	NaN	none
PRKACA	VASP	5566	7408	986	0.896644	0.140786	0.66	NaN	none
IKBKE	TBK1	9641	29110	933	0.817439	0.0920263	0.78	HC	valid
RPS6KA5	SMAD6	9252	4091	957	0.851509	0.282177	0.63	HC	valid
CALR	PLAT	811	5327	956	0.850032	0.10834	0.85	NaN	none
CTSG	CXCR4	1511	7852	984	0.893386	0.223581	0.52	NaN	none
IKBKE	NFKBIA	9641	4792	997	0.914955	0.131081	0.52	HC	valid
BCL10	TRAF2	8915	7186	935	0.820169	0.428568	0.86	LC	less_valid
COL1A1	THBS1	1277	7057	1000	0.920066	0.137554	0.75	HC	valid
CXCL10	CXCL3	3627	2921	950	0.841274	0.269999	NA	HC	valid
ATP6V0A2	ATP6V1C2	23545	245973	994	0.909894	0.137554	NA	HC	valid
HSP90AA1	IRAK4	3320	51135	936	0.821542	0.101821	NA	HC	valid
ARHGEF7	EGF	8874	1950	920	0.800162	0.111597	NA	LC	less_valid
HSP90AA1	PRKCI	3320	5584	995	0.911575	0.245383	0.72	HC	valid
PLCG2	ZAP70	5336	7535	993	0.908218	0.0493994	NA	HC	valid
HES1	JAG1	3280	182	984	0.893386	0.21731	NA	LC	less_valid
ACOX3	SMURF2	8310	64750	972	0.874296	0.251568	0.63	NaN	none
CAV1	TRAF6	857	7189	936	0.821542	0.428568	0.52	NaN	none
ADRBK1	CAV1	156	857	958	0.852992	0.105082	0.85	NaN	none
FGA	FGB	2243	2244	950	0.841274	0.131081	0.88	NaN	none
FGFR2	ITGA5	2263	3678	982.5	0.890957	0.11485	0.65	NaN	none
ATM	PRKDC	472	5591	945	0.834114	0.0789389	0.86	NaN	none
RB1	TP53	5925	7157	996	0.913262	-0.0822135	0.63	NaN	none
GNB3	GNG11	2784	2791	926	0.808036	0.0985584	NA	HC	valid
POLR1D	PXN	51082	5829	966	0.86504	0.0854863	0.49	NaN	none
GGA3	TSG101	23163	7251	981	0.888541	0.341656	0.65	NaN	none
GNAI2	GNAZ	2771	2781	984	0.893386	0.229834	NA	HC	valid
RRAS2	TRAF2	22800	7186	963	0.860483	0.140786	0.49	LC	less_valid
SMAD3	SRC	4088	6714	945.333	0.834588	0.475744	0.63	NaN	none
ROBO1	SOS1	6091	6654	921	0.801463	0.00329597	NA	LC	less_valid
ATP6V0A4	ATP6V1C2	50617	245973	1000	0.920066	0.150464	NA	HC	valid
LAMA5	LAMC2	3911	3918	986	0.896644	0.172931	0.52	HC	valid
BUB1	PPP2R1A	699	5518	956	0.850032	0.0164784	NA	HC	valid
CAV1	CAV2	857	858	934.5	0.819485	0.703115	0.88	NaN	none
AKT1	ITGB4	207	3691	997	0.914955	0.0592581	NA	HC	valid
FGFR2	PDGFB	2263	5155	936	0.821542	0.527507	NA	LC	less_valid
CAB39	STK11	51719	6794	1000	0.920066	0.309245	0.88	NaN	none
CALM3	YWHAE	808	7531	975.5	0.879784	0.0428215	0.8	NaN	none
ACTB	LCK	60	3932	958	0.852992	0.0197733	0.55	MC	less_valid
CCL17	CXCL3	6361	2921	954	0.847092	0.223581	NA	HC	valid
FLT1	PTPRJ	2321	5795	977	0.882156	0.1569	0.59	LC	less_valid
PRKCZ	RHOQ	5590	23433	933	0.817439	0	NA	HC	valid
ACTN4	TJP1	81	7082	966	0.86504	0.0559731	0.88	HC	valid
MDM2	SMC3	4193	9126	997	0.914955	0.0395311	0.49	NaN	none
CREBBP	NCOR2	1387	9612	956	0.850032	0.0428215	0.63	MC	less_valid
PRKCQ	RASGRP3	5588	25780	996	0.913262	0.315194	0.52	HC	valid
JUND	MDM2	3727	4193	998	0.916653	0.248478	0.63	NaN	none
HSP90AA1	TRADD	3320	8717	923	0.804078	0.242283	0.72	NaN	none
GGA3	RABEP1	23163	9135	968	0.868105	0.364732	0.73	NaN	none
MAPK3	PTPRJ	5595	5795	953	0.84563	0.111597	0.88	HC	valid
MYC	PIM1	4609	5292	944	0.832698	0.0691052	0.63	MC	less_valid
LCK	MS4A1	3932	931	936	0.821542	0.0789389	0.73	NaN	none
ERBB2	IQGAP1	2064	8826	927	0.809365	0.0887573	0.68	LC	less_valid
MAPK7	PML	5598	5371	936	0.821542	0.188872	0.75	NaN	none
FER	PTPN1	2241	5770	993	0.908218	0.144015	NA	HC	valid
HEXA	HEXB	3073	3074	963	0.860483	0.118102	NA	HC	valid
CNTFR	CRK	1271	1398	953	0.84563	0.0822135	0.63	HC	valid
ARF6	ATP6V1C1	382	528	987	0.898281	0.282177	0.79	NaN	none
CRK	MAP4K1	1398	11184	973	0.875858	0.1569	0.9	HC	valid
IQGAP1	PRKACG	8826	5568	934	0.818802	0.0296551	NA	HC	valid
GGA1	SMAD3	26088	4088	963	0.860483	0.297273	0.63	NaN	none
BLNK	CD72	29760	971	971	0.872741	0.176127	0.83	NaN	none
ELK1	TAOK2	2002	9344	994	0.909894	0.229834	0.52	LC	less_valid
ARRB1	TUBB	408	203068	921	0.801463	0.131081	0.63	NaN	none
MYD88	SMAD3	4615	4088	998	0.916653	0.160113	0.73	NaN	none
RELA	SMAD4	5970	4089	980	0.886936	0.046111	0.49	NaN	none
FLNB	NFKB1	2317	4790	959	0.85448	0.282177	0.63	NaN	none
AGA	IGF2R	175	3482	978	0.883744	0.553172	0.52	NaN	none
FLNC	JAM2	2318	58494	998	0.916653	0.0691052	0.63	NaN	none
CCL16	PPBP	6360	5473	944	0.832698	0.188872	NA	HC	valid
ADRB3	DRD1	155	1812	938	0.824301	0.144015	NA	HC	valid
ACTB	ATP6V1B2	60	526	989	0.901571	0.166529	0.55	NaN	none
AP3B1	ARRB2	8546	409	986	0.896644	0.668217	0.76	NaN	none
CLTC	EPN2	1213	22905	995	0.911575	0.584377	0.85	NaN	none
F11	KNG1	2160	3827	936	0.821542	0.150464	0.86	NaN	none
CASP3	YWHAG	836	7532	963	0.860483	0.00988761	0.49	NaN	none
RAC2	SMAD1	5880	4086	977	0.882156	0.188872	0.52	LC	less_valid
MAX	MYC	4149	4609	926	0.808036	0.376107	1	HC	valid
BIRC3	RAF1	330	5894	957.5	0.85225	0.137554	0.75	NaN	none
CASP3	PRKCQ	836	5588	967	0.86657	0.12135	0.52	LC	less_valid
KDR	PTK2B	3791	2185	997	0.914955	0.236068	NA	HC	valid
PRKACA	VTN	5566	7448	1000	0.920066	0.124596	0.52	NaN	none
PPARGC1A	PRKAA2	10891	5563	944	0.832698	-0.00988761	NA	HC	valid
DCN	PLA2G2A	1634	5320	993	0.908218	0.0164784	0.86	NaN	none
TFDP2	YWHAE	7029	7531	999	0.918357	0.0920263	0.81	NaN	none
IL12A	IL8	3592	3576	938	0.824301	0.105082	0.52	NaN	none
CCR1	STAT1	1230	6772	971	0.872741	0.179319	0.52	HC	valid
ITGB3	PTPN1	3690	5770	980	0.886936	0.179319	0.72	NaN	none
CHEK1	PPM1D	1111	8493	929	0.812037	0.0362399	NA	HC	valid
ACVR2A	BMP4	92	652	1000	0.920066	0.412288	NA	HC	valid
AGTR1	PTGER1	185	5731	983	0.891765	0.00659186	NA	HC	valid
ACSL6	FLNC	23305	2318	969	0.869645	0.0723847	0.63	MC	less_valid
ITGB3	PTK2B	3690	2185	920	0.800162	0.192048	0.76	NaN	none
CCL19	CCL21	6363	6366	927	0.809365	0.0887573	NA	HC	valid
MCM5	NFKBIA	4174	4792	924	0.805392	-0.0526868	0.73	NaN	none
ARAF	YWHAG	369	7532	962	0.858975	0.0559731	0.88	NaN	none
NGFR	NTRK2	4804	4915	942	0.829879	0.198389	0.52	LC	less_valid
B2M	CD8A	567	925	981	0.888541	0.220448	0.52	NaN	none
EP300	SREBF1	2033	6720	999	0.918357	0.1569	0.79	MC	less_valid
ERBB2	ERBB3	2064	2065	972	0.874296	0.166529	0.97	HC	valid
CXCL13	CXCL3	10563	2921	940	0.82708	0.118102	NA	HC	valid
HSP90AA1	PRKCD	3320	5580	943.5	0.831991	0.239178	0.52	HC	valid
IKBKG	PPM1B	8517	5495	998	0.916653	0.169732	0.83	NaN	none
BMPR1B	TGFBR2	658	7048	997	0.914955	0.169732	NA	HC	valid
DAPP1	FGR	27071	2268	934	0.818802	0.257733	NA	HC	valid
HGS	TSG101	9146	7251	994	0.909894	0.401286	0.96	NaN	none
CARD8	NOD2	22900	64127	958	0.852992	0.137554	NA	HC	valid
BDKRB2	GRK5	624	2869	945	0.834114	0.101821	0.55	HC	valid
ACTB	HCK	60	3055	934	0.818802	0.384565	0.52	MC	less_valid
CDC42	CDKN1A	998	1026	996	0.913262	0.0691052	0.56	NaN	none
SMAD7	STAMBP	4092	10617	973	0.875858	0.185691	0.73	NaN	none
BCL10	BIRC2	8915	329	970	0.87119	0.0395311	0.82	HC	valid
F7	IKBKG	2155	8517	923	0.804078	0.0854863	0.72	NaN	none
AP1B1	NTRK2	162	4915	999	0.918357	0.626117	0.49	NaN	none
PRKCD	PRKCH	5580	5583	932.5	0.81676	0.0164784	NA	HC	valid
PPARA	PRKCD	5465	5580	953	0.84563	0.105082	0.52	HC	valid
F2R	HTR2C	2149	3358	974	0.877424	0.105082	NA	HC	valid
AP2B1	SMURF1	163	57154	1000	0.920066	0.582202	0.52	NaN	none
FGR	HCK	2268	3055	960	0.855973	0.344564	NA	HC	valid
CAV1	TGFBR1	857	7046	979.5	0.886136	0.684312	0.75	NaN	none
CDKN1B	SRC	1027	6714	988	0.899923	0.192048	0.71	NaN	none
CFLAR	TRAF2	8837	7186	996	0.913262	-0.0789389	0.85	NaN	none
MET	TNC	4233	3371	989	0.901571	0.201553	NA	LC	less_valid
HRAS	NTRK1	3265	4914	962	0.858975	0.118102	NA	MC	less_valid
CCL5	CX3CL1	6352	6376	928	0.810699	0.0887573	NA	HC	valid
ARRB2	TUBB2C	409	10383	951	0.842721	0.124596	0.63	NaN	none
CRK	FLT4	1398	2324	999	0.918357	0.134319	NA	LC	less_valid
HES1	NOTCH2	3280	4853	1000	0.920066	0.282177	NA	LC	less_valid
GNB5	GNG2	10681	54331	932	0.816081	0.220448	0.63	HC	valid
PTAFR	TRHR	5724	7201	984	0.893386	0.160113	NA	HC	valid
JUND	SMAD3	3727	4088	990	0.903225	0.291252	0.75	NaN	none
AP3S1	AP4M1	1176	9179	961	0.857471	0.21731	NA	HC	valid
JAK2	TYK2	3717	7297	983	0.891765	0.0985584	NA	HC	valid
CDC25C	SRC	995	6714	948	0.838395	0.153684	0.65	LC	less_valid
LCP2	LYN	3937	4067	975	0.878996	0.105082	0.79	HC	valid
GRK4	NEDD4	2868	4734	999	0.918357	0.452472	0.56	MC	less_valid
FLNC	MYH9	2318	4627	960	0.855973	0.12784	0.63	HC	valid
HSP90AA1	TNFRSF1A	3320	7132	981	0.888541	0.12135	0.62	NaN	none
AXIN1	NCK2	8312	8440	931	0.814728	-0.0395311	0.62	NaN	none
CHMP2A	USP8	27243	9101	986	0.896644	0.26694	0.56	NaN	none
ABL1	ERBB4	25	2066	968	0.868105	0.344564	0.63	HC	valid
BLNK	CD22	29760	933	973	0.875858	0.242283	NA	HC	valid
CDK4	TP53	1019	7157	963	0.860483	-0.0263617	NA	HC	valid
FOS	SRC	2353	6714	995	0.911575	0.420462	NA	LC	less_valid
MAPK7	YWHAE	5598	7531	1000	0.920066	0.0428215	0.63	HC	valid
ACTG1	NFKB1	71	4790	962.5	0.859728	0.21102	0.63	NaN	none
ERBB2	TGFA	2064	7039	991	0.904884	0.140786	0.52	NaN	none
CD19	CD9	930	928	935	0.820169	0.0197733	0.73	NaN	none
CD209	ITGAM	30835	3684	977	0.882156	0.160113	0.52	HC	valid
CASP9	MAP2K2	842	5605	960	0.855973	0.0822135	0.55	HC	valid
PRKDC	RELA	5591	5970	997	0.914955	0.0920263	0.72	NaN	none
BAX	PMAIP1	581	5366	954	0.847092	0.0362399	0.73	NaN	none
CDC42	PRKCI	998	5584	972.667	0.875337	0.169732	0.95	HC	valid
CNTFR	IL6ST	1271	3572	977	0.882156	0.324072	0.88	HC	valid
ATP6V0A4	ATP6V1B2	50617	526	939	0.825688	0.263876	NA	HC	valid
RAF1	RASA1	5894	5921	990	0.903225	0.160113	NA	HC	valid
ARF6	RAB11FIP3	382	9727	922	0.802768	0.245383	0.52	NaN	none
ATP6V1E2	ATP6V1F	90423	9296	951	0.842721	0.291252	NA	HC	valid
DNM1	SRC	1759	6714	1000	0.920066	0.628117	0.85	HC	valid
CCR8	GNG2	1237	54331	946	0.835536	0.21102	NA	HC	valid
MAP3K11	TRAF2	4296	7186	952	0.844173	0.498368	0.63	NaN	none
ACTB	EPB41L3	60	23136	984	0.893386	0.0854863	0.55	LC	less_valid
CCL17	VCAM1	6361	7412	994	0.909894	0.245383	0.75	NaN	none
FGFR2	PDGFA	2263	5154	933.5	0.81812	0.662708	NA	LC	less_valid
BLNK	CBL	29760	867	938	0.824301	0.144015	NA	HC	valid
CAV1	PTPN6	857	5777	997	0.914955	-0.0691052	0.88	NaN	none
PPP1CA	PRKCD	5499	5580	958.75	0.854107	0.00659186	0.55	HC	valid
ARF6	ATP6V0C	382	527	987	0.898281	0.21102	0.52	NaN	none
F13A1	F13B	2162	2165	930	0.81338	0.0395311	0.87	NaN	none
ACTB	EPB41	60	2035	979	0.885338	-0.12784	0.55	LC	less_valid
TICAM1	TNFAIP3	148022	7128	932	0.816081	0.172931	0.65	NaN	none
TBK1	TLR3	29110	7098	987	0.898281	0.0263617	0.63	NaN	none
FOS	STAT3	2353	6774	989	0.901571	0.0428215	NA	LC	less_valid
FOS	RPS6KA2	2353	6196	980	0.886936	0.0723847	0.52	HC	valid
SMURF2	TRAF2	64750	7186	932	0.816081	0.153684	0.72	NaN	none
COL1A2	SMAD3	1278	4088	996	0.913262	0.263876	NA	MC	less_valid
HRAS	RET	3265	5979	931	0.814728	0.0789389	NA	MC	less_valid
HCK	LCK	3055	3932	958	0.852992	0.147241	NA	HC	valid
GGA1	TSG101	26088	7251	999	0.918357	0.47829	0.65	NaN	none
ACTB	PLD2	60	5338	921	0.801463	0.505763	0.55	NaN	none
KIT	RASA1	3815	5921	993	0.908218	0.260807	0.52	HC	valid
STX7	VAMP3	8417	9341	972	0.874296	0.689534	0.63	HC	valid
EHHADH	MYC	1962	4609	950	0.841274	0.35036	0.63	NaN	none
CCL16	CXCL6	6360	6372	997	0.914955	0.198389	NA	HC	valid
MAP4K4	TP53	9448	7157	997	0.914955	0.201553	NA	HC	valid
CLTC	MAP3K8	1213	1326	971	0.872741	0.359004	0.63	LC	less_valid
PRKAB2	TRAF2	5565	7186	953	0.84563	0.0329479	0.63	NaN	none
ARRB2	CLTC	409	1213	998	0.916653	0.668217	0.65	NaN	none
TRAF2	TUBB	7186	203068	965	0.863516	0.359004	0.72	NaN	none
EGF	HGF	1950	3082	1000	0.920066	0.134319	NA	HC	valid
CD247	CD3E	919	916	920	0.800162	0.251568	NA	HC	valid
FLNB	LAMC1	2317	3915	977	0.882156	0.166529	0.63	NaN	none
PAK1	PRKCD	5058	5580	974.5	0.87821	0.10834	0.52	HC	valid
ATP6V1F	ATP6V1G1	9296	9550	948	0.838395	0.19522	NA	HC	valid
ARHGDIA	CDC42	396	998	926	0.808036	0.111597	0.96	HC	valid
CAV1	PLD1	857	5337	974	0.877424	0.300275	0.62	NaN	none
CTSD	IGF2R	1509	3482	1000	0.920066	0.495887	0.52	NaN	none
GGA1	HGS	26088	9146	995	0.911575	0.595124	0.63	HC	valid
POLR2H	POLR3K	5437	51728	992	0.906548	0.198389	NA	HC	valid
SMAD4	STK11	4089	6794	938	0.824301	0.0197733	NA	HC	valid
GP1BA	KNG1	2811	3827	980	0.886936	0.153684	0.55	NaN	none
ATP6V0B	ATP6V1B2	533	526	960	0.855973	0.468058	NA	LC	less_valid
BMPR1B	BMPR2	658	659	985	0.895012	0.163323	0.85	HC	valid
MAPK3	SREBF1	5595	6720	937	0.822919	0.21102	0.77	MC	less_valid
CAV1	CSNK2A2	857	1459	1000	0.920066	0.140786	0.52	NaN	none
SMAD6	WWP1	4091	11059	929	0.812037	0.257733	0.63	NaN	none
BCAR1	PTPRF	9564	5792	993	0.908218	-0.0197733	0.63	HC	valid
TNFRSF10B	TNFRSF1A	8795	7132	976	0.880574	0.0230678	0.55	HC	valid
ACADL	EHHADH	33	1962	998	0.916653	0.282177	NA	LC	less_valid
CD28	CD4	940	920	970	0.87119	0.131081	0.52	HC	valid
PIN1	RAF1	5300	5894	920	0.800162	0.101821	0.55	NaN	none
ACOX2	PEX5	8309	5830	930	0.81338	0.182507	NA	LC	less_valid
CAV1	SRC	857	6714	979.5	0.886136	0.803159	0.88	NaN	none
BDKRB2	NOS3	624	4846	995	0.911575	0.176127	0.62	NaN	none
NR4A1	SRC	3164	6714	1000	0.920066	0.204713	0.63	NaN	none
BDKRB1	CCR3	623	1232	970	0.87119	0.172931	NA	HC	valid
NGFR	PRKACB	4804	5567	993	0.908218	0.0263617	0.78	HC	valid
CAV1	ERBB2	857	2064	982	0.89015	0.179319	0.55	NaN	none
CD4	PIK3R1	920	5295	922	0.802768	0.0592581	0.52	HC	valid
ATP6V1C2	ATP6V1H	245973	51606	998	0.916653	0.140786	NA	MC	less_valid
PRKCG	VCAM1	5582	7412	984	0.893386	0.118102	NA	HC	valid
RIPK3	TICAM1	11035	148022	951	0.842721	0.19522	0.74	NaN	none
MYD88	TNFRSF1A	4615	7132	986	0.896644	0.0756626	NA	HC	valid
CD4	CD86	920	942	975	0.878996	0.12135	NA	HC	valid
BCAR1	ZYX	9564	7791	949	0.839832	-0.0559731	0.72	LC	less_valid
CANX	PDIA3	821	2923	926	0.808036	0.0822135	0.52	NaN	none
MAP3K1	RAF1	4214	5894	931	0.814728	0.395741	0.78	HC	valid
PRKACA	THOP1	5566	7064	935	0.820169	0.0526868	0.55	NaN	none
PF4	PPBP	5196	5473	979	0.885338	0.182507	NA	HC	valid
HGS	VPS4A	9146	27183	999	0.918357	0.344564	0.63	NaN	none
MAPK14	PRKG1	1432	5592	932	0.816081	0.0887573	NA	HC	valid
RPS6KA1	RPS6KA4	6195	8986	968.5	0.868874	0.338741	NA	HC	valid
ERBB2	NRG1	2064	3084	994	0.909894	-0.0526868	0.76	NaN	none
CD247	CD28	919	940	989	0.901571	0.12135	0.52	NaN	none
CD86	LCK	942	3932	940	0.82708	0.0691052	NA	HC	valid
CD38	PECAM1	952	5175	961	0.857471	0.0658243	0.52	NaN	none
F2R	PTGER1	2149	5731	955	0.848559	0.198389	NA	HC	valid
MCM7	PRKDC	4176	5591	983	0.891765	0.0263617	0.63	NaN	none
FGFR2	PIK3R1	2263	5295	960	0.855973	0.131081	0.72	LC	less_valid
ARRB2	PPM1A	409	5494	997	0.914955	0.248478	0.63	NaN	none
COL1A2	TNC	1278	3371	994	0.909894	0.35036	NA	LC	less_valid
IL6ST	LIF	3572	3976	980	0.886936	0.245383	0.86	NaN	none
IL12RB1	IL2	3594	3558	975	0.878996	0.273051	NA	MC	less_valid
CRKL	MET	1399	4233	949.5	0.840552	0.229834	NA	LC	less_valid
JAK3	PTK2B	3718	2185	936	0.821542	0.373274	0.73	HC	valid
CREBBP	SMAD1	1387	4086	956	0.850032	0.192048	0.82	LC	less_valid
EGF	NTRK2	1950	4915	1000	0.920066	0.510653	NA	HC	valid
CAV1	GNAI2	857	2771	975	0.878996	-0.0197733	0.52	NaN	none
CDK2	MCM6	1017	4175	994	0.909894	-0.0164784	NA	LC	less_valid
AKT1	BCAR1	207	9564	963	0.860483	0.0887573	NA	HC	valid
SH3GLB1	SH3GLB2	51100	56904	984	0.893386	0.315194	0.88	HC	valid
ATP6V1C2	ATP6V1D	245973	51382	930	0.81338	0.353248	NA	HC	valid
CSF2RB	STAT1	1439	6772	997	0.914955	0.12784	0.52	HC	valid
FGF2	PDGFRA	2247	5156	939.5	0.826384	0.245383	NA	LC	less_valid
ATP6V1B2	ATP6V1C2	526	245973	956	0.850032	0.285208	NA	MC	less_valid
AP2B1	HGS	163	9146	999	0.918357	0.605663	NA	HC	valid
BDKRB2	HTR2B	624	3357	974	0.877424	0.0920263	NA	HC	valid
CRKL	ZAP70	1399	7535	933	0.817439	0.12784	0	HC	valid
PRKCG	SRC	5582	6714	920.25	0.800487	0.637991	NA	HC	valid
HCK	ZAP70	3055	7535	928	0.810699	0.144015	NA	HC	valid
ACTB	SRC	60	6714	997	0.914955	0.73944	0.52	MC	less_valid
MAP2K4	MAP4K2	6416	5871	937	0.822919	0.0197733	0.75	HC	valid
LIPE	MAPK3	3991	5595	966	0.86504	0.124596	0.52	NaN	none
CHMP2A	CHMP6	27243	79643	988	0.899923	0.457699	NA	MC	less_valid
EP300	PCK2	2033	5106	998	0.916653	-0.0329479	0.63	NaN	none
FOS	RPS6KA5	2353	9252	990	0.903225	0.303271	NA	HC	valid
CSNK2A2	PAK1	1459	5058	942.5	0.830582	0.22671	0.52	HC	valid
MAP3K5	MYC	4217	4609	981	0.888541	0.134319	0.63	MC	less_valid
ATR	E2F1	545	1869	925	0.806712	0.0263617	0.55	NaN	none
F7	F9	2155	2158	988	0.899923	0.297273	0.52	HC	valid
MAP3K3	NEDD4	4215	4734	960	0.855973	0.373274	0.59	MC	less_valid
VEGFA	VEGFB	7422	7423	938.5	0.824994	0.245383	0.52	MC	less_valid
SRC	WASL	6714	8976	998	0.916653	0.124596	NA	HC	valid
PEX10	PEX5	5192	5830	929	0.812037	0.367586	0.86	NaN	none
CASP3	MET	836	4233	954	0.847092	0.223581	0.55	NaN	none
ATP6V1A	GBA	523	2629	948	0.838395	0.214167	0.63	NaN	none
MAP3K5	SOD1	4217	6647	920	0.800162	0.150464	NA	HC	valid
MAPK12	MAPT	6300	4137	932	0.816081	-0.00329597	0.66	NaN	none
BCL10	TNFRSF10A	8915	8797	967	0.86657	0.248478	0.65	HC	valid
EPHA6	FYN	285220	2534	923	0.804078	-0.0263617	NA	HC	valid
JUND	NR4A1	3727	3164	975	0.878996	0.163323	NA	LC	less_valid
NFKBIA	TLR2	4792	7097	972	0.874296	0.12784	NA	LC	less_valid
AP1B1	ARRB2	162	409	1000	0.920066	0.682555	0.77	NaN	none
CDC42	YES1	998	7525	979	0.885338	0.0625419	NA	HC	valid
DAPP1	PLCG1	27071	5335	938	0.824301	0.248478	0.55	HC	valid
ADRA1B	PTGER1	147	5731	1000	0.920066	0.344564	NA	HC	valid
CHMP4C	VPS4A	92421	27183	976	0.880574	0.315194	0.63	NaN	none
FLT4	ITGB1	2324	3688	1000	0.920066	0.12784	0.73	NaN	none
TGFBR1	WWP1	7046	11059	986	0.896644	0.223581	NA	HC	valid
F10	PLG	2159	5340	975	0.878996	0.192048	0.75	HC	valid
CD86	PIK3R3	942	8503	950	0.841274	0.131081	NA	HC	valid
BCL10	BIRC3	8915	330	986	0.896644	0.257733	0.82	HC	valid
IL2RB	PIK3R1	3560	5295	991	0.904884	0.105082	0.55	NaN	none
HGS	VPS37C	9146	55048	992	0.906548	0.517925	0.65	NaN	none
PARD6A	PRKCH	50855	5583	960	0.855973	0.0131832	0.52	HC	valid
AKT3	GNAO1	10000	2775	973	0.875858	0.0592581	NA	MC	less_valid
MAPT	RPS6KA3	4137	6197	972	0.874296	0.0395311	0.81	NaN	none
ATP2A3	NCK1	489	4690	992	0.906548	0.0756626	0.63	NaN	none
IKBKE	POLR2H	9641	5437	952	0.844173	0.150464	0.63	NaN	none
CASP3	HSPB1	836	3315	999	0.918357	0.245383	0.63	NaN	none
AP1M2	LDLR	10053	3949	995	0.911575	0.367586	0.74	NaN	none
PARD6A	TJP1	50855	7082	998	0.916653	0.147241	NA	HC	valid
IGF1R	PRKCD	3480	5580	995.667	0.9127	0.131081	0.52	HC	valid
CHMP4B	STAMBP	128866	10617	955	0.848559	0.423172	0.79	NaN	none
ATP6V0C	ATP6V1B1	527	525	954	0.847092	-0.0197733	NA	LC	less_valid
JAK2	PPP2R5A	3717	5525	980	0.886936	0.0985584	0.52	NaN	none
CAV1	RASA1	857	5921	995	0.911575	0.239178	0.56	NaN	none
BTK	DAPP1	695	27071	962	0.858975	0.0559731	0.52	HC	valid
ACTB	EPB41L2	60	2037	984	0.893386	0.327018	0.55	LC	less_valid
CLTC	MAP3K3	1213	4215	999	0.918357	0.441925	0.72	LC	less_valid
GRIN2B	PRKACG	2904	5568	967	0.86657	0.0789389	NA	HC	valid
CASP3	MAP4K1	836	11184	961	0.857471	0.147241	0.52	LC	less_valid
SPTAN1	WASF1	6709	8936	979	0.885338	0.11485	0	MC	less_valid
EGF	ITGA2	1950	3673	930.333	0.813829	0.239178	NA	HC	valid
GNA13	MAP3K5	10672	4217	999	0.918357	0.12135	0.72	MC	less_valid
F10	PROS1	2159	5627	971	0.872741	0.0723847	0.65	HC	valid
ARRB2	PPM1B	409	5495	973	0.875858	0.584377	0.63	NaN	none
BMPR2	STAT3	659	6774	925	0.806712	0.0592581	NA	HC	valid
CHRM3	CSNK1A1	1131	1452	923	0.804078	0.0395311	0.75	NaN	none
ATP6V1C1	ATP6V1G1	528	9550	984	0.893386	0.124596	NA	LC	less_valid
APC	CREBBP	324	1387	981	0.888541	0.297273	0.63	NaN	none
MAP3K7	SMAD3	6885	4088	922.667	0.803641	0.172931	0.52	NaN	none
CDC42	GNAZ	998	2781	969	0.869645	0.0428215	NA	LC	less_valid
AP2B1	AP2M1	163	1173	984	0.893386	0.515509	0.76	HC	valid
CRK	FLNC	1398	2318	983	0.891765	0.468058	0.63	HC	valid
HSPA8	MAP2K1	3312	5604	970	0.87119	0.137554	0.63	HC	valid
FGFR2	PAK4	2263	10298	934	0.818802	-0.0789389	0.67	HC	valid
RNF41	USP8	10193	9101	977	0.882156	0.332893	0.77	NaN	none
CD3E	JAK3	916	3718	928	0.810699	0.229834	0.72	NaN	none
PLCG2	SRC	5336	6714	997	0.914955	0.704778	NA	HC	valid
GNS	SRC	2799	6714	990	0.903225	0.279141	0.63	NaN	none
IKBKG	RIPK2	8517	8767	992	0.906548	0.0920263	0.88	NaN	none
ATP6V1C1	ATP6V1D	528	51382	1000	0.920066	0.575628	NA	HC	valid
PTK2	TSC1	5747	7248	957	0.851509	0.0658243	0.72	NaN	none
MYD88	NFKBIA	4615	4792	941.5	0.829177	0.140786	NA	HC	valid
CSNK1A1	TP53	1452	7157	960	0.855973	0.140786	0.78	HC	valid
TUBB2C	VCL	10383	7414	1000	0.920066	0.150464	0.49	NaN	none
BMPR2	MAP3K7	659	6885	923	0.804078	0.150464	NA	HC	valid
HTR2B	TRHR	3357	7201	933	0.817439	0.0789389	NA	HC	valid
CDH1	EGF	999	1950	999	0.918357	0.0985584	NA	HC	valid
ATP6V0A1	ATP6V1C1	535	528	999	0.918357	0.409549	NA	HC	valid
DGKZ	HRAS	8525	3265	997	0.914955	0.124596	0.74	HC	valid
ARF6	SRC	382	6714	993	0.908218	0.321119	NA	LC	less_valid
PPP1CA	TP53	5499	7157	928.5	0.811367	0.00988761	0.74	NaN	none
CSF1R	SRC	1436	6714	922	0.802768	0.288233	0.72	HC	valid
CAV3	PDGFRA	859	5156	941.5	0.829177	0.347465	0.75	NaN	none
GLB1	GUSB	2720	2990	974	0.877424	0.347465	NA	MC	less_valid
BAX	PPP1CA	581	5499	921	0.801463	0.0493994	0.55	NaN	none
AKT1	BAIAP2	207	10458	990	0.903225	0.0887573	NA	LC	less_valid
CCNH	TP53	902	7157	997	0.914955	0.0592581	0.77	NaN	none
PDGFRB	RAF1	5159	5894	924.75	0.806382	0.105082	0.85	HC	valid
AP2A1	EPN1	160	29924	972	0.874296	0.229834	0.55	NaN	none
LNPEP	SLC2A4	4012	6517	992	0.906548	0.0428215	0.59	NaN	none
AP1B1	ARF6	162	382	959	0.85448	0.254653	0.52	HC	valid
CCND1	PRKCI	595	5584	962	0.858975	0.21102	NA	HC	valid
AP2A1	NAGPA	160	51172	964	0.861997	0.439269	0.75	NaN	none
NOTCH2	SMAD1	4853	4086	965	0.863516	0.176127	0.63	NaN	none
SRC	SRF	6714	6722	998	0.916653	0.447214	0.78	NaN	none
ENAH	PFN1	55740	5216	943	0.831286	0.046111	0.76	NaN	none
MAPK8IP3	SRC	23162	6714	997	0.914955	0.55088	0.65	NaN	none
CAV1	PDGFRB	857	5159	985.5	0.895827	0.0658243	0.79	NaN	none
CSNK1A1	PPP2CA	1452	5515	990	0.903225	0.124596	0.72	HC	valid
CD63	SRF	967	6722	977	0.882156	0.163323	0.63	NaN	none
HIF1A	PIAS4	3091	51588	999	0.918357	0.229834	0.63	NaN	none
MAP3K11	TRAF6	4296	7189	999	0.918357	0.223581	0.63	NaN	none
PRKCG	VTN	5582	7448	1000	0.920066	0.229834	0.52	NaN	none
MAP3K1	TUBB	4214	203068	923	0.804078	0.229834	0.72	NaN	none
CDC25A	RAF1	993	5894	999	0.918357	0.0789389	0.9	NaN	none
HGS	MAP3K7	9146	6885	961	0.857471	0.462894	0.86	NaN	none
JAK1	PDGFRB	3716	5159	999	0.918357	0.239178	0.65	HC	valid
BMPR2	SMURF2	659	64750	988	0.899923	0.0854863	NA	HC	valid
ABL1	CNTFR	25	1271	976	0.880574	0.198389	0.63	HC	valid
CRKL	SYK	1399	6850	993	0.908218	0.0887573	0.79	HC	valid
ACTN1	PTPN1	87	5770	1000	0.920066	0.12784	0.71	NaN	none
MAPK13	RIPK2	5603	8767	927.5	0.810031	0.364732	NA	HC	valid
FLT1	RASA1	2321	5921	1000	0.920066	0.153684	NA	LC	less_valid
ACTB	CD4	60	920	924	0.805392	0.0854863	0.55	NaN	none
HTR2C	PTAFR	3358	5724	941	0.828477	0.21731	NA	HC	valid
ATP2B4	CALM3	493	808	996	0.913262	0.188872	0.72	NaN	none
CSNK1E	DVL3	1454	1857	936	0.821542	-0.0854863	0.59	HC	valid
FGFR1	NEDD4	2260	4734	940	0.82708	0.182507	0.89	NaN	none
ATP6V1A	CTSD	523	1509	982	0.89015	0.201553	0.63	NaN	none
PRKDC	YWHAG	5591	7532	969	0.869645	0.0296551	0.65	LC	less_valid
BLNK	HCK	29760	3055	965	0.863516	0.41502	NA	HC	valid
IRAK1	NOD2	3654	64127	926	0.808036	0.10834	NA	HC	valid
MAP4K2	TNFRSF1A	5871	7132	973	0.875858	0.176127	NA	HC	valid
NTRK2	PTPN11	4915	5781	951	0.842721	-0.0756626	0.52	LC	less_valid
BMP4	KDR	652	3791	997	0.914955	0.179319	NA	LC	less_valid
FGR	PLD2	2268	5338	945	0.834114	0.188872	NA	HC	valid
ABL1	ABL2	25	27	972	0.874296	0.188872	0.79	HC	valid
AKT1	ERBB3	207	2065	996	0.913262	0.306261	0.63	HC	valid
CYC1	UQCRB	1537	7381	979	0.885338	-0.0230678	0.61	NaN	none
PRKCD	TP53	5580	7157	956	0.850032	0.21102	NA	HC	valid
DNM1	PLCG1	1759	5335	993	0.908218	0.198389	0.62	HC	valid
ARRB2	CTNNA1	409	1495	920	0.800162	0.0526868	0.63	NaN	none
BCAR1	CBL	9564	867	956	0.850032	0.201553	NA	MC	less_valid
CYP4A11	PIK3R1	1579	5295	938	0.824301	0.0526868	0.63	NaN	none
KDR	STAT1	3791	6772	997	0.914955	0.220448	0.55	HC	valid
CTNNB1	MITF	1499	4286	936	0.821542	0.0164784	0.52	NaN	none
CRKL	POLR1D	1399	51082	964	0.861997	0.0197733	0.49	NaN	none
HSP90AA1	TBK1	3320	29110	924	0.805392	0.198389	0.73	HC	valid
POLR3D	POLR3G	661	10622	936	0.821542	0.279141	0.72	NaN	none
CHRM1	PTGER1	1128	5731	981	0.888541	0.338741	NA	HC	valid
FCGR2A	LAT	2212	27040	975	0.878996	0.0952934	0.83	NaN	none
HSP90AA1	NFKBIE	3320	4794	970	0.87119	0.239178	0.63	NaN	none
COL1A1	TNC	1277	3371	1000	0.920066	0.239178	NA	LC	less_valid
CAV1	PLD2	857	5338	984	0.893386	0.584377	0.85	NaN	none
CLTC	NFKB1	1213	4790	985	0.895012	0.575628	0.63	NaN	none
CASP5	NLRC4	838	58484	944	0.832698	0.223581	NA	HC	valid
CAV1	PDGFRA	857	5156	966.5	0.865804	0.364732	0.88	NaN	none
CD3D	CD8A	915	925	996	0.913262	0.131081	0.79	NaN	none
BMPR1B	PAK1	658	5058	984	0.893386	0.185691	0.52	HC	valid
ABL1	MDM2	25	4193	938	0.824301	0.0723847	0.79	LC	less_valid
ULK1	ULK2	8408	9706	974	0.877424	0.176127	NA	HC	valid
BTK	HCK	695	3055	967	0.86657	0.0985584	0.75	HC	valid
APC	CTNNBIP1	324	56998	998	0.916653	0.0887573	0.72	NaN	none
IRAK1	TNFRSF1A	3654	7132	973	0.875858	0.0723847	NA	HC	valid
ERBB3	FGFR1	2065	2260	935	0.820169	0.22671	0.63	HC	valid
ACTB	AKT1	60	207	956	0.850032	0.332893	0.63	HC	valid
SHC2	SOS1	25759	6654	948.8	0.839544	0.327018	NA	HC	valid
PEX5	SCP2	5830	6342	997	0.914955	0.179319	NA	LC	less_valid
GGA2	HGS	23062	9146	984	0.893386	0.242283	0.87	HC	valid
HGS	NEDD4	9146	4734	1000	0.920066	0.462894	0.88	NaN	none
DGKZ	SRC	8525	6714	1000	0.920066	0.452472	0.55	HC	valid
NFKB1	NR4A1	4790	3164	981	0.888541	0.21102	0.63	NaN	none
BCAR1	PPAP2B	9564	8613	930	0.81338	0.00988761	0.52	NaN	none
PEX10	PEX12	5192	5193	992	0.906548	0.657126	0.95	LC	less_valid
MYC	TUBA1B	4609	10376	1000	0.920066	0.447214	0.55	NaN	none
AKT1	PARD6A	207	50855	990	0.903225	0.327018	NA	HC	valid
GRM5	PRKCD	2915	5580	985.5	0.895827	0.0131832	0.52	HC	valid
CYC1	UQCRC1	1537	7384	987	0.898281	0.0592581	0.59	NaN	none
AKT1	STK4	207	6789	971	0.872741	0.111597	0.8	HC	valid
CLTC	KIT	1213	3815	997	0.914955	0.67185	0.73	NaN	none
ERBB4	RASA1	2066	5921	946	0.835536	0.163323	0.63	LC	less_valid
GRIN1	MAP2K2	2902	5605	932	0.816081	0.166529	0.59	HC	valid
GRIA1	GRM5	2890	2915	927	0.809365	0.046111	NA	HC	valid
ATP6V1C1	TCIRG1	528	10312	999	0.918357	0.153684	NA	HC	valid
ACVR2B	BMP4	93	652	979	0.885338	0.364732	NA	HC	valid
PARD6A	SMURF1	50855	57154	994	0.909894	0.475744	0.7	HC	valid
FES	JAK1	2242	3716	970	0.87119	0.0789389	0.52	HC	valid
IKBKB	PPM1B	3551	5495	993	0.908218	0.232954	0.77	HC	valid
CREB3	EP300	10488	2033	980	0.886936	-0.00329597	NA	MC	less_valid
PRKCH	SRC	5583	6714	980	0.886936	0.0329479	0.52	HC	valid
ERBB4	PTPN11	2066	5781	984	0.893386	-0.046111	0.75	LC	less_valid
COL1A2	SMAD4	1278	4089	987	0.898281	0.198389	NA	MC	less_valid
GSK3B	RBPJ	2932	3516	1000	0.920066	0.19522	0.63	LC	less_valid
AKT1	PI4K2B	207	55300	985	0.895012	0.0756626	0.63	LC	less_valid
IRF3	RELA	3661	5970	974	0.877424	0.0559731	0.59	NaN	none
ILK	PDPK1	3611	5170	997	0.914955	0.169732	0.73	HC	valid
GNAO1	MAP2K4	2775	6416	991	0.904884	0.046111	NA	MC	less_valid
HSD17B4	RELB	3295	5971	965	0.863516	0.0723847	0.72	NaN	none
ADRBK1	GNG2	156	54331	955	0.848559	0.0920263	NA	LC	less_valid
AP3B1	CLTC	8546	1213	965	0.863516	0.717803	0.52	MC	less_valid
CALM3	CRHR1	808	1394	946	0.835536	0.0822135	0.59	NaN	none
PRKCG	PTPN1	5582	5770	975.5	0.879784	0.297273	0.65	HC	valid
AP3D1	ARRB2	8943	409	991	0.904884	0.318159	0.63	NaN	none
ABL1	CBLC	25	23624	999	0.918357	-0.0131832	NA	HC	valid
IKBKG	PRKCI	8517	5584	978.5	0.88454	0.192048	0.49	NaN	none
CREBBP	SRC	1387	6714	932.333	0.816533	0.500841	0.73	LC	less_valid
ATP6V1A	CHMP4B	523	128866	964	0.861997	0.201553	0.63	NaN	none
ATP6V1C2	ATP6V1F	245973	9296	976	0.880574	0.332893	NA	MC	less_valid
MAP3K2	SMURF1	10746	57154	997	0.914955	0.515509	0.72	HC	valid
STK11	TP53	6794	7157	947	0.836963	0.160113	0.86	HC	valid
RAF1	YWHAG	5894	7532	980	0.886936	0.0428215	0.89	NaN	none
PPM1B	RASGRP1	5495	10125	944	0.832698	0.223581	0.76	NaN	none
IKBKG	VAMP3	8517	9341	984	0.893386	0.236068	0.56	NaN	none
AZI2	TICAM1	64343	148022	979	0.885338	0.263876	0.52	NaN	none
AKT1	AXIN1	207	8312	996	0.913262	0.0296551	NA	HC	valid
ABL2	JAK1	27	3716	990	0.903225	0.166529	0.72	HC	valid
TNFAIP3	TRAF2	7128	7186	928	0.810699	-0.00988761	0.93	NaN	none
SRC	VCL	6714	7414	1000	0.920066	0.390167	0.52	NaN	none
CREBBP	HIF1A	1387	3091	1000	0.920066	0.21731	0.97	NaN	none
F2R	GNG2	2149	54331	939	0.825688	0.140786	NA	HC	valid
AP2A1	ARRB2	160	409	1000	0.920066	0.562255	0.63	NaN	none
JAK1	TEC	3716	100124696	949	0.839832	0.10834	0.73	HC	valid
ACTB	SMAD3	60	4088	949	0.839832	0.294266	0.7	NaN	none
EHHADH	SCP2	1962	6342	963	0.860483	0.288233	0.52	NaN	none
FOS	SMAD3	2353	4088	992	0.906548	0.150464	0.78	NaN	none
IKBKE	RELA	9641	5970	983	0.891765	0.185691	0.52	HC	valid
IKBKE	PAK1	9641	5058	963	0.860483	0.0920263	0.63	HC	valid
RELA	STAT3	5970	6774	970.5	0.871965	0.0164784	0.9	NaN	none
JAK2	JAK3	3717	3718	934.5	0.819485	0.332893	0.52	HC	valid
AKT3	GNAZ	10000	2781	972	0.874296	0.0592581	NA	MC	less_valid
BDKRB1	CCR7	623	1236	995	0.911575	0.144015	NA	HC	valid
ID2	RBL2	3398	5934	997	0.914955	0.160113	0.75	NaN	none
ACTB	HSD17B4	60	3295	986	0.896644	0.0789389	0.52	LC	less_valid
CBLC	ITCH	23624	83737	980	0.886936	0.163323	0.85	NaN	none
PIK3R2	SOCS7	5296	30837	997	0.914955	-0.137554	0.52	HC	valid
CXCR4	LCK	7852	3932	933	0.817439	0.046111	NA	HC	valid
CCL16	CCL19	6360	6363	981	0.888541	0.111597	NA	HC	valid
CD63	KIT	967	3815	977	0.882156	0.204713	0.72	NaN	none
EHD1	IGF1R	10938	3480	929	0.812037	0.19522	0.75	NaN	none
ERBB2	HBEGF	2064	1839	967	0.86657	0.0854863	NA	LC	less_valid
ERBB2	ERBB4	2064	2066	996	0.913262	0.223581	0.94	HC	valid
CDH1	VCL	999	7414	935	0.820169	0.0559731	0.83	NaN	none
ATP6V0A2	ATP6V1C1	23545	528	976	0.880574	0.207869	NA	HC	valid
ADRB2	MDM2	154	4193	992	0.906548	0.315194	0.52	NaN	none
RAB5A	RASA1	5868	5921	931	0.814728	0.294266	0.52	HC	valid
BLNK	CD79A	29760	973	921	0.801463	-0.0164784	0.88	HC	valid
AKT1	MAP3K11	207	4296	967	0.86657	0.160113	0.79	HC	valid
MAPT	TUBB	4137	203068	986	0.896644	-0.0428215	0.52	NaN	none
DGKZ	PIK3CA	8525	5290	997	0.914955	0.263876	0.77	LC	less_valid
ITGA5	STAMBP	3678	10617	955	0.848559	0.144015	0.49	NaN	none
GNG11	GNG13	2791	51764	960	0.855973	0.0723847	NA	HC	valid
PPP2CB	TRAF6	5516	7189	973	0.875858	-0.00329597	0.63	NaN	none
LTBR	TRAF2	4055	7186	986	0.896644	0.470628	0.95	HC	valid
AP2A1	HGS	160	9146	993	0.908218	0.624109	NA	HC	valid
CLTCL1	TNFRSF1A	8218	7132	987	0.898281	0.21102	0.72	NaN	none
FGF12	MAPK8IP2	2257	23542	1000	0.920066	0.47319	0.77	NaN	none
MAP4K4	MYD88	9448	4615	995	0.800124	0.0691052	NA	HC	valid
PLAUR	SRC	5329	6714	998	0.803028	0.0691052	NA	LC	less_valid
CHRM3	GZMB	1131	3002	999	0.804001	0	0.55	NaN	none
EGF	PLAU	1950	5328	1000	0.804978	0.105082	NA	HC	valid
RCHY1	SERPINA1	25898	5265	999	0.804001	0.0131832	0.63	NaN	none
EPHB1	SRC	2047	6714	1000	0.804978	0.147241	NA	HC	valid
ATP1A1	EXOC4	476	60412	997	0.802057	0.0164784	0.63	NaN	none
CREB1	NTRK2	1385	4915	997	0.802057	0.0887573	NA	LC	less_valid
ANAPC5	TGFBR1	51433	7046	999	0.804001	0.19522	0.52	NaN	none
CDH5	TGFBR1	1003	7046	996	0.801089	-0.0362399	NA	LC	less_valid
EFNB2	SRC	1948	6714	999	0.804001	0.0362399	0.59	NaN	none
ATR	HSP90AA1	545	3320	995	0.800124	0.0658243	0.63	NaN	none
CAPN1	CTSC	823	1075	995	0.800124	0.0559731	0.63	NaN	none
DLG1	SRC	1739	6714	998	0.803028	0.303271	NA	HC	valid
APC	TUBA4A	324	7277	995	0.800124	0.169732	0.76	NaN	none
FES	PPID	2242	5481	998	0.803028	0.0263617	0.75	NaN	none
NGFR	TSC1	4804	7248	997	0.802057	0.0526868	0.63	NaN	none
FLT1	NCK1	2321	4690	996	0.801089	0.0559731	0.63	LC	less_valid
RET	STAT1	5979	6772	995	0.800124	0.11485	NA	LC	less_valid
AP4M1	GRIN2B	9179	2904	998	0.803028	0.0493994	0.63	NaN	none
ARRB2	CALM3	409	808	997	0.802057	0.163323	0.63	NaN	none
IGF2R	PLAU	3482	5328	995	0.800124	0.0428215	0.52	LC	less_valid
EDNRA	GNRHR	1909	2798	1000	0.804978	0	NA	HC	valid
CXCL13	DRD2	10563	1813	999	0.804001	0.0362399	NA	HC	valid
CCNH	SSX2IP	902	117178	1000	0.804978	0.0822135	0.63	NaN	none
GNA13	TGFBR1	10672	7046	999	0.804001	0.214167	0.52	MC	less_valid
HSP90AA1	TGFBR1	3320	7046	1000	0.804978	0.285208	0.78	HC	valid
ABL1	HSP90AA1	25	3320	996	0.801089	0.153684	0.74	LC	less_valid
LHB	LHCGR	3972	3973	997	0.802057	0.12135	0.52	NaN	none
GNA12	TEC	2768	100124696	1000	0.804978	0.0723847	0.73	NaN	none
PDPK1	PTPRC	5170	5788	1000	0.804978	0.00329597	0.68	HC	valid
CREBBP	IRF5	1387	3663	1000	0.804978	0.0493994	0.88	NaN	none
FRS2	RND1	10818	27289	997	0.802057	0	0.52	NaN	none
HSP90AA1	NOS1	3320	4842	1000	0.804978	0.251568	0.65	NaN	none
FN1	PLAU	2335	5328	997	0.802057	0.105082	NA	LC	less_valid
GNA12	GNG2	2768	54331	995	0.800124	0.101821	NA	HC	valid
HSP90AA1	MDM2	3320	4193	999	0.804001	0.118102	0.63	NaN	none
LCK	PTPRM	3932	5797	997	0.802057	0.0723847	0.68	HC	valid
RAB11A	RCHY1	8766	25898	1000	0.804978	0.0428215	0.49	NaN	none
CD79A	SRC	973	6714	996	0.801089	0.0559731	NA	HC	valid
SLC8A1	YWHAE	6546	7531	1000	0.804978	0.0658243	0.52	NaN	none
DPYSL2	TUBB	1808	203068	995	0.800124	0.0493994	0.55	NaN	none
ATM	SREBF1	472	6720	1000	0.804978	0.172931	0.63	NaN	none
ARRB2	SPTAN1	409	6709	1000	0.804978	0.12135	0.63	NaN	none
NFKBIE	TUBB	4794	203068	998	0.803028	0.147241	0.63	NaN	none
CDK5	PIP5K1C	1020	23396	997	0.802057	0.00988761	0.52	NaN	none
GNAI2	LHCGR	2771	3973	1000	0.804978	-0.0263617	0.52	HC	valid
EPHA7	HCK	2045	3055	996	0.801089	0.0559731	NA	HC	valid
ARHGEF7	JAK1	8874	3716	1000	0.804978	0.0952934	NA	LC	less_valid
KDR	PTPRC	3791	5788	1000	0.804978	0.0789389	NA	LC	less_valid
ARHGEF7	AURKA	8874	6790	995	0.800124	0.046111	NA	HC	valid
CASP7	GZMB	840	3002	1000	0.804978	0.0658243	0.52	NaN	none
CTSG	SERPIND1	1511	3053	999	0.804001	0.0592581	0.52	HC	valid
ENAH	RPS6KA1	55740	6195	1000	0.804978	0.0756626	0.63	NaN	none
A2M	LEP	2	3952	995	0.800124	0.0559731	0.75	NaN	none
AP1B1	PRKDC	162	5591	999	0.804001	0.0625419	0.63	NaN	none
DAPP1	YES1	27071	7525	997	0.802057	0.0592581	NA	HC	valid
ARHGEF7	FYN	8874	2534	1000	0.804978	0.0691052	NA	HC	valid
ACTN1	NUMBL	87	9253	995	0.800124	0.0559731	0.63	NaN	none
TGFB1	VTN	7040	7448	1000	0.804978	0.0428215	0.85	NaN	none
GNA12	IL3RA	2768	3563	1000	0.804978	0.192048	0.49	NaN	none
F8	VEGFC	2157	7424	995	0.800124	0.0559731	NA	MC	less_valid
PSTPIP1	TUBB	9051	203068	997	0.802057	0.00659186	0.63	NaN	none
ATF2	CSNK2A2	1386	1459	1000	0.804978	0.101821	0.78	HC	valid
HGF	SERPINE1	3082	5054	995	0.800124	0.0131832	NA	HC	valid
BDKRB2	GNRHR	624	2798	1000	0.804978	0.11485	NA	HC	valid
ETS1	STAT6	2113	6778	996	0.801089	0.0493994	0.52	LC	less_valid
GZMB	PRKDC	3002	5591	996	0.801089	0.0920263	0.52	NaN	none
RHOQ	VAV2	23433	7410	997	0.802057	0.0329479	NA	HC	valid
ARHGDIA	RDX	396	5962	998	0.803028	0.0395311	0.88	NaN	none
FGR	SRC	2268	6714	1000	0.804978	0.163323	0.63	HC	valid
LCP2	SRC	3937	6714	1000	0.804978	0.0493994	0.56	HC	valid
DVL3	FLNB	1857	2317	999	0.804001	0.0854863	0.63	HC	valid
IKBKB	MYH10	3551	4628	996	0.801089	0.0625419	0.72	HC	valid
CCL21	CTSD	6366	1509	998	0.803028	0.179319	0.52	NaN	none
AP2B1	ATM	163	472	999	0.804001	0.179319	0.67	NaN	none
CDC27	PPP5C	996	5536	999	0.804001	0.0329479	0.78	HC	valid
AP2A1	DPYSL2	160	1808	996	0.801089	0.0592581	0.78	NaN	none
JAK2	NFKB2	3717	4791	999	0.804001	0.0164784	NA	HC	valid
ABL1	MAPT	25	4137	997	0.802057	-0.0526868	0.52	NaN	none
SIRPA	SRC	140885	6714	1000	0.804978	0.0854863	NA	HC	valid
AP1B1	CREBBP	162	1387	1000	0.804978	0.185691	0.72	NaN	none
ATP1A1	JAG1	476	182	996	0.801089	0.0197733	0.63	LC	less_valid
PECAM1	YES1	5175	7525	1000	0.804978	0.0197733	0.74	NaN	none
HSP90AA1	NOS3	3320	4846	998	0.803028	0.0756626	0.9	NaN	none
CREBBP	SPI1	1387	6688	996	0.801089	-0.0164784	0.72	LC	less_valid
ITGB5	NUMB	3693	8650	998	0.803028	0.0526868	0.59	NaN	none
DAB2	DVL3	1601	1857	1000	0.804978	0.0559731	0.89	HC	valid
CCR1	JAK1	1230	3716	996	0.801089	0.160113	0.52	NaN	none
ARHGDIA	SH3GL3	396	6457	1000	0.804978	0.0789389	0.73	NaN	none
PI4KB	YWHAQ	5298	10971	995	0.800124	-0.0230678	0.89	LC	less_valid
GNG2	GNRHR	54331	2798	1000	0.804978	0.0658243	NA	HC	valid
BMP4	FGFR2	652	2263	997	0.802057	0.163323	NA	LC	less_valid
MDM2	NUMB	4193	8650	996	0.801089	0.00988761	0.9	NaN	none
CDKN2C	LY96	1031	23643	998	0.803028	0.0395311	0.49	NaN	none
GNRHR	PTGER1	2798	5731	1000	0.804978	0.21731	NA	HC	valid
ARRB2	CSNK1A1L	409	122011	998	0.803028	0.1569	0.63	NaN	none
MMP9	TNC	4318	3371	998	0.803028	0.0362399	NA	LC	less_valid
MAP3K7	SLC9A1	6885	6548	998	0.803028	0.0493994	0.56	NaN	none
CALM3	RDX	808	5962	997	0.802057	0.00659186	0.56	NaN	none
TNFRSF11A	TRAF3	8792	7187	1000	0.804978	0.0329479	0.96	HC	valid
CD7	PI4KA	924	5297	996	0.801089	0.0131832	0.52	NaN	none
CASP7	MAP3K1	840	4214	997	0.802057	0.0723847	NA	LC	less_valid
AURKA	SOD2	6790	6648	999	0.804001	0.134319	0.76	NaN	none
ADRB2	PRKCD	154	5580	999	0.804001	0.26694	0.52	NaN	none
RIPK3	TUBB	11035	203068	997	0.802057	0.0691052	0.72	NaN	none
AGTR1	GRK5	185	2869	996	0.801089	-0.0164784	0.83	HC	valid
HCK	SRC	3055	6714	1000	0.804978	0.370434	0.63	HC	valid
FLT1	PLCG2	2321	5336	1000	0.804978	0.367586	0.65	LC	less_valid
CYLD	DVL3	1540	1857	999	0.804001	0.131081	0.63	LC	less_valid
CFLAR	RAF1	8837	5894	997	0.802057	-0.046111	0.84	NaN	none
EPHA3	SRC	2042	6714	996	0.801089	0.12135	0.75	HC	valid
ADORA2B	NTN1	136	9423	997	0.802057	0.0526868	0.55	NaN	none
LAMA5	PLG	3911	5340	1000	0.804978	0.0559731	0.75	NaN	none
HGS	PIK3R1	9146	5295	999	0.804001	0.131081	0.62	NaN	none
CSF1R	PTPN1	1436	5770	997	0.802057	0.0887573	NA	HC	valid
IKBKE	RDX	9641	5962	997	0.802057	0.00329597	0.63	NaN	none
PLG	RUVBL1	5340	8607	1000	0.804978	0.0887573	0.52	NaN	none
ARF6	CAPN1	382	823	999	0.804001	0.0592581	0.52	NaN	none
ARRB2	CDK7	409	1022	999	0.804001	0.0952934	0.63	NaN	none
PTPN1	STAM2	5770	10254	998	0.803028	0.147241	NA	HC	valid
CREB3	MS4A1	10488	931	999	0.804001	0.0131832	0.63	NaN	none
CD63	CD81	967	975	1000	0.804978	0.0559731	0.49	NaN	none
CSNK2A2	PRKDC	1459	5591	998	0.803028	0.0493994	0.49	LC	less_valid
ERBB2	PTPRC	2064	5788	995	0.800124	0.0854863	0.68	HC	valid
GZMB	IGF2R	3002	3482	998	0.803028	0.0952934	0.52	LC	less_valid
ERBB3	HCK	2065	3055	1000	0.804978	0.257733	0.63	HC	valid
GNA13	TBXA2R	10672	6915	998	0.803028	0.0526868	0.83	HC	valid
NFKB1	RUVBL1	4790	8607	998	0.803028	0.0723847	0.63	NaN	none
RIPK2	SMURF1	8767	57154	999	0.804001	0.239178	0.52	HC	valid
PIK3R2	USP8	5296	9101	999	0.804001	0.248478	NA	LC	less_valid
SMC3	TUBB	9126	203068	999	0.804001	0.0197733	0.72	NaN	none
IL18	IL1RAP	3606	3556	997	0.802057	0.0329479	NA	LC	less_valid
SRC	TRIP6	6714	7205	996	0.801089	0.00329597	0.84	LC	less_valid
CSNK1G1	YWHAE	53944	7531	1000	0.804978	0.0362399	NA	HC	valid
CFL2	MAP3K3	1073	4215	1000	0.804978	0.118102	0.72	MC	less_valid
AP1M1	GRIN2B	8907	2904	1000	0.804978	0.0952934	0.63	NaN	none
CALM3	GRK1	808	6011	999	0.804001	0.0985584	0.52	NaN	none
EXOC3	GRIN2B	11336	2904	1000	0.804978	0.0625419	0.72	NaN	none
ABL1	CAV1	25	857	995	0.800124	0.192048	0.52	NaN	none
FYN	IL2RB	2534	3560	995	0.800124	0.0952934	0.52	NaN	none
IQGAP1	PRKAR2B	8826	5577	996	0.801089	0	NA	HC	valid
CAV1	PTPN11	857	5781	997	0.802057	-0.0658243	0.88	NaN	none

## Sheet: TableS3bPredictionforInhibition
Table S3 (b) Predictions for inhibition
Gene symbol gene 1	Gene symbol gene 2	EntrezGene gene 1	EntrezGene gene 2	Votes	Confidence	ESR	HIPPIE Score	DOMINE	DOMINE_LABEL
HIF1A	NOTCH1	3091	4851	85	0.805967	-0.131081	0.63	NaN	none
IKBKG	POLR2E	8517	5434	28	0.902877	0.0592581	0.63	NaN	none
BUB1B	CHEK1	701	1111	4	0.949353	0.00988761	NA	HC	valid
CSNK1G3	TP53	1456	7157	27	0.904743	0.134319	NA	HC	valid
CDC20	CREBBP	991	1387	84	0.807512	-0.0658243	0.63	HC	valid
POLR3D	POLR3K	661	51728	39	0.882734	0.0263617	0.72	NaN	none
RAB11FIP5	SMAD3	26056	4088	0	0.957445	0.182507	0.63	NaN	none
IL2RG	STK4	3561	6789	32	0.895469	0.269999	0.49	HC	valid
ATP6V0E1	ATP6V1E1	8992	529	13	0.931511	0.160113	0.63	NaN	none
BIRC2	CFLAR	329	8837	25	0.908495	0.0559731	NA	HC	valid
FLT3	PTPN6	2322	5777	54	0.856401	0.00988761	0.52	HC	valid
CCNE1	FBXO5	898	26271	2	0.953386	0.153684	NA	HC	valid
PDGFRA	STAT3	5156	6774	62	0.84288	-0.00329597	0.52	LC	less_valid
SMAD3	VAV2	4088	7410	35	0.889976	0.144015	0.63	LC	less_valid
CCNB1	WEE1	891	7465	27	0.904743	0.0526868	NA	HC	valid
E2F1	RBL2	1869	5934	34	0.891801	0.0164784	NA	LC	less_valid
CAMK2B	RXRG	816	6258	29	0.901016	0.0658243	0.63	HC	valid
ATP6V0B	ATP6V1B1	533	525	4	0.949353	0.140786	NA	LC	less_valid
CDK2	PPP2CA	1017	5515	87	0.802891	0.0329479	0.69	HC	valid
PRLR	STAT5B	5618	6777	22	0.914167	0.00329597	0.63	NaN	none
BUB1B	TP53	701	7157	70	0.829714	-0.0985584	NA	HC	valid
CD63	ITGB1	967	3688	66	0.836253	0.140786	0.87	NaN	none
CFD	SERPINE1	1675	5054	73	0.824868	0.0131832	NA	HC	valid
MAP3K3	YWHAQ	4215	10971	42	0.877363	-0.0559731	0.73	HC	valid
CSF3R	LCK	1441	3932	36	0.888157	-0.0197733	0.52	HC	valid
PPP2CA	PRKDC	5515	5591	2	0.953386	0.0230678	0.63	NaN	none
CDC6	CDK6	990	1021	71	0.828093	0.0263617	0.68	NaN	none
CBL	NOTCH1	867	4851	66	0.836253	0.0789389	0.65	HC	valid
CD9	ITGA5	928	3678	49	0.865035	0.00659186	0.84	NaN	none
CDK2	CDKN2C	1017	1031	1	0.955412	0.00988761	NA	HC	valid
E2F1	RBX1	1869	9978	46	0.870284	0.0362399	0.52	NaN	none
AURKA	CDC16	6790	8881	65	0.837901	-0.0230678	NA	HC	valid
PARD6A	ROCK2	50855	9475	42	0.877363	-0.0263617	NA	HC	valid
FLT3	STAT3	2322	6774	38	0.884536	-0.00988761	NA	HC	valid
CDK7	DDB2	1022	1643	65	0.837901	0.0920263	NA	HC	valid
BTK	IRAK1	695	3654	50	0.863297	0.0395311	0.52	HC	valid
ADORA2B	ADRB2	136	154	24	0.91038	0.341656	NA	HC	valid
CREB1	RPS6KA3	1385	6197	66	0.836253	0.10834	0.66	HC	valid
MAML3	NOTCH2	55534	4853	75	0.821664	0.124596	0.52	NaN	none
CBL	SPRY4	867	81848	26	0.906616	-0.0329479	0.79	NaN	none
CBL	PDGFRB	867	5159	47	0.868529	-0.0230678	0.75	LC	less_valid
ATP6V0A1	ATP6V1G1	535	9550	22	0.914167	0.22671	NA	HC	valid
ATP6V1C1	ATP6V1F	528	9296	53	0.858116	0.637991	NA	MC	less_valid
ATP6V1C2	ATP6V1G1	245973	9550	9	0.939379	0.176127	NA	LC	less_valid
WEE1	YWHAQ	7465	10971	21	0.91607	-0.0362399	0.63	HC	valid
CDC25B	FBXW11	994	23291	55	0.854691	-0.0164784	0.86	NaN	none
HSPA8	PPP5C	3312	5536	34	0.891801	0.166529	0.7	MC	less_valid
CFLAR	IKBKB	8837	3551	69	0.831341	0.0263617	0.52	LC	less_valid
IRS1	PRKAA2	3667	5563	35	0.889976	0.0559731	NA	HC	valid
ERBB2	SOCS1	2064	8651	1	0.955412	-0.046111	0.63	LC	less_valid
SFN	YWHAG	2810	7532	84	0.807512	0.0230678	0.86	HC	valid
GNAZ	HRAS	2781	3265	15	0.927614	-0.0230678	NA	LC	less_valid
MAP3K4	PTPN11	4216	5781	68	0.832972	-0.00659186	0.52	HC	valid
CASP3	CDKN1A	836	1026	2	0.953386	8.67362e-18	0.63	NaN	none
PPP2R1A	ZFYVE9	5518	9372	54	0.856401	0.0428215	0.73	NaN	none
CDC6	MYC	990	4609	51	0.861564	0.046111	0.79	NaN	none
CCNE1	E2F5	898	1875	28	0.902877	0.0395311	NA	HC	valid
NR4A1	RPS6KA6	3164	27330	55	0.854691	0.239178	0.73	HC	valid
PKMYT1	STEAP3	9088	55240	22	0.914167	0.0296551	0.77	NaN	none
E2F3	E2F5	1871	1875	57	0.851288	0.0493994	NA	LC	less_valid
EP300	MDM2	2033	4193	3	0.951366	0.046111	0.9	LC	less_valid
GLI2	MAP2K1	2736	5604	31	0.897312	-0.364732	NA	HC	valid
MYH10	PPP2CB	4628	5516	3	0.951366	0.00329597	0.63	LC	less_valid
CDKN2C	PPP2CA	1031	5515	0	0.957445	-0.0559731	0.49	NaN	none
CXCR4	PTPN11	7852	5781	76	0.82007	0.0164784	0.52	HC	valid
C3	FLNC	718	2318	64	0.839555	0.694685	0.63	NaN	none
DVL2	TP53	1856	7157	81	0.812181	0.00659186	0.73	NaN	none
PIAS1	SMAD1	8554	4086	43	0.875585	-0.111597	0.63	NaN	none
AKT1	PIAS1	207	8554	37	0.886343	-0.0625419	0.63	NaN	none
CDC25C	MAPK14	995	1432	75	0.821664	0.0329479	0.89	HC	valid
IRS1	PRKCZ	3667	5590	58	0.849595	-0.0329479	0.62	HC	valid
CCNE1	WEE1	898	7465	1	0.955412	0.0625419	NA	HC	valid
ATP6V1E2	TCIRG1	90423	10312	38	0.884536	0.0887573	NA	HC	valid
CREBBP	CTBP1	1387	1487	54	0.856401	-0.147241	0.8	LC	less_valid
NF1	SMAD3	4763	4088	20	0.917979	0.251568	0.56	NaN	none
CDC20	PPP1CC	991	5501	27	0.904743	0.0559731	NA	HC	valid
CASP8	RB1	841	5925	23	0.91227	0.0428215	0.52	NaN	none
AKT1	PIAS2	207	9063	49	0.865035	0	0.63	NaN	none
MAP3K13	MAPK8IP1	9175	9479	6	0.945344	0.182507	0.73	LC	less_valid
CDKN1B	YWHAG	1027	7532	62	0.84288	0.0789389	0.62	NaN	none
PRLR	PTPN11	5618	5781	36	0.888157	0.0362399	0.83	NaN	none
MAML2	NOTCH3	84441	4854	60	0.846226	0.0197733	0.52	NaN	none
PRL	PRLR	5617	5618	3	0.951366	0.0592581	0.72	NaN	none
CDKN1B	YWHAQ	1027	10971	12	0.933469	-0.00329597	0.88	NaN	none
PTPN11	SYK	5781	6850	69	0.831341	-0.0362399	NA	HC	valid
POLR1C	POLR2E	9533	5434	68	0.832972	0.00988761	NA	HC	valid
GNAI1	WASF1	2770	8936	83.5	0.808287	-0.0428215	0.52	NaN	none
NFKBIB	NGFR	4793	4804	65	0.837901	-0.00659186	0.55	HC	valid
DLL4	HES1	54567	3280	47	0.868529	0.166529	NA	LC	less_valid
AURKA	IKBKB	6790	3551	14	0.929559	0.0493994	0.75	HC	valid
CD4	PTPRC	920	5788	85	0.805967	0.0230678	0.75	NaN	none
MAP3K3	PPP2R1B	4215	5519	3	0.951366	-0.101821	0.72	HC	valid
PDGFRB	SOCS1	5159	8651	39	0.882734	-0.0723847	0.63	HC	valid
LCP2	PTPRC	3937	5788	48	0.866779	-0.0197733	0.52	HC	valid
PTPN6	SOCS3	5777	9021	0	0.957445	0.285208	NA	HC	valid
RHOD	TGFBR1	29984	7046	83	0.809063	0.0789389	0.59	HC	valid
IL7R	STAT5B	3575	6777	75.5	0.820866	0.0920263	0.52	HC	valid
A2M	CTSB	2	1508	80	0.813748	0.0164784	0.52	NaN	none
CCND1	MAPK14	595	1432	65	0.837901	0.254653	NA	HC	valid
FBXW11	PRLR	23291	5618	4	0.949353	0.0493994	0.7	NaN	none
ELK1	PIAS2	2002	9063	71	0.828093	0.0559731	0.52	NaN	none
LIFR	PLCG1	3977	5335	13	0.931511	0.137554	0.52	HC	valid
PDCD1	PTPN11	5133	5781	52	0.859838	0.0197733	0.63	HC	valid
FLNB	STK4	2317	6789	12	0.933469	0.273051	0.63	NaN	none
CD44	FYN	960	2534	82	0.81062	-0.0197733	0.86	NaN	none
AKT1	GLI2	207	2736	0	0.957445	-0.0985584	NA	HC	valid
CRK	GP9	1398	2815	61	0.84455	0.11485	0.63	NaN	none
CFLAR	TP53	8837	7157	8	0.941361	-0.0197733	0.82	NaN	none
BUB1	CDC20	699	991	26	0.906616	0	0.55	HC	valid
CACNA1C	PPM1A	775	5494	71	0.828093	0.166529	0.55	NaN	none
PTK2	TNFRSF1A	5747	7132	49	0.865035	0.0197733	0.52	NaN	none
ABL1	YWHAH	25	7533	40	0.880938	-0.046111	0.65	MC	less_valid
DDB2	RBX1	1643	9978	14	0.929559	0.111597	0.73	NaN	none
GLI2	HES1	2736	3280	16	0.925675	-0.45509	NA	LC	less_valid
CASP3	RBX1	836	9978	19	0.919894	-0.0789389	0.63	NaN	none
FYN	SPTAN1	2534	6709	50	0.863297	0.0952934	NA	HC	valid
GLI2	MAPK14	2736	1432	53	0.858116	-0.105082	NA	HC	valid
IRS1	JAK2	3667	3717	7	0.94335	0.0164784	0.95	HC	valid
CASP7	CFLAR	840	8837	56	0.852987	0.0822135	0.55	HC	valid
CDK4	HSP90AA1	1019	3320	71	0.828093	-0.0985584	0.82	HC	valid
CSF2RB	IL5RA	1439	3568	8	0.941361	0.0789389	0.87	NaN	none
CSNK1E	RBX1	1454	9978	62	0.84288	-0.0197733	0.63	NaN	none
GHR	NCK1	2690	4690	54	0.856401	0.220448	0.63	HC	valid
FYN	PTPN11	2534	5781	42	0.877363	-0.0197733	0.84	HC	valid
SOS1	ZAP70	6654	7535	71	0.828093	0.00329597	0.55	HC	valid
CUL1	IKBKB	8454	3551	58	0.849595	0.00988761	0.63	MC	less_valid
CALR	THBS1	811	7057	26	0.906616	0.22671	0.52	NaN	none
ACVR2B	BMPR2	93	659	83	0.809063	0.282177	NA	HC	valid
SMAD3	WEE1	4088	7465	73	0.824868	0.0230678	0.59	HC	valid
MCM6	MCM7	4175	4176	50	0.863297	0.0493994	0.99	HC	valid
CFLAR	RIPK1	8837	8737	47	0.868529	0.0428215	0.88	MC	less_valid
MAP3K1	TNFRSF10B	4214	8795	72	0.826478	0.0395311	NA	HC	valid
BUB1B	MAD2L1	701	4085	46	0.870284	0.0329479	0.88	NaN	none
CCND1	NOTCH1	595	4851	67	0.83461	-0.0197733	NA	MC	less_valid
CCND1	CUL1	595	8454	70.5	0.828903	0.0854863	0.73	LC	less_valid
AP2M1	EHD2	1173	30846	9	0.939379	0.584377	0.85	NaN	none
FOS	PML	2353	5371	11	0.935433	0.239178	0.84	NaN	none
SMC1B	SMC3	27127	9126	80	0.813748	0.0197733	0.72	HC	valid
IKBKG	PCK1	8517	5105	12	0.933469	0.0263617	0.56	NaN	none
IL12RB1	STAT6	3594	6778	75	0.821664	0.105082	NA	HC	valid
CDC6	MCM2	990	4171	73	0.824868	0.0131832	0.72	NaN	none
DAB2	SMAD3	1601	4088	65	0.837901	0.239178	0.89	NaN	none
AURKA	RRM2	6790	6241	18	0.921815	0.131081	NA	MC	less_valid
CRKL	NOTCH2	1399	4853	38	0.884536	0.10834	0.63	HC	valid
IL21	IL21R	59067	50615	11	0.935433	0.163323	0.73	NaN	none
IL2RG	IL7	3561	3574	67	0.83461	0.0493994	0.86	LC	less_valid
IL9	IL9R	3578	3581	1	0.955412	-0.00988761	0.65	NaN	none
BMPR1B	MAP3K7	658	6885	21	0.91607	0.309245	NA	HC	valid
FBXO5	FZR1	26271	51343	28	0.902877	-0.0789389	0.88	HC	valid
ACACA	ACACB	31	32	16	0.925675	0.0395311	NA	HC	valid
SMC3	STAG2	9126	10735	13	0.931511	-0.0230678	0.88	NaN	none
BAX	SFN	581	2810	76	0.82007	-0.00659186	0.65	NaN	none
POLR3A	POLR3K	11128	51728	85	0.805967	0.0428215	NA	HC	valid
NUMB	TP53	8650	7157	16	0.925675	0.0131832	0.82	NaN	none
EP300	MCM5	2033	4174	85	0.805967	-0.046111	0.63	NaN	none
CBL	PTPN6	867	5777	86.5	0.803658	0.0887573	0.74	HC	valid
FYN	ITPR1	2534	3708	36	0.888157	0.169732	0.52	NaN	none
INSRR	PIK3R1	3645	5295	79	0.815321	0.0854863	NA	HC	valid
CCND1	RBX1	595	9978	39.5	0.881835	0.0887573	0.73	NaN	none
CCNE1	RBL2	898	5934	13	0.931511	0.0263617	0.83	NaN	none
FOS	VAV2	2353	7410	88	0.801361	0.0952934	NA	LC	less_valid
CREBBP	E2F1	1387	1869	3	0.951366	0.00329597	0.77	LC	less_valid
CRKL	MAP4K1	1399	11184	86	0.804426	0.188872	0.9	HC	valid
ITGA5	MMP9	3678	4318	76	0.82007	0.0559731	0.63	NaN	none
CDK2	RBL2	1017	5934	67	0.83461	0.0263617	0.9	NaN	none
IL2	IL6ST	3558	3572	49	0.865035	0.150464	NA	MC	less_valid
ATP6V1B1	TCIRG1	525	10312	21	0.91607	0.12784	NA	HC	valid
CTBP1	TP53	1487	7157	7	0.94335	-0.105082	0.63	NaN	none
BCL2L1	CFLAR	598	8837	5	0.947345	0.118102	0.84	NaN	none
FER	PDGFRB	2241	5159	26	0.906616	0.0854863	NA	HC	valid
CTBP1	TBL1X	1487	6907	73	0.824868	-0.118102	0.72	HC	valid
CCNH	MYC	902	4609	52	0.859838	0.0592581	0.56	NaN	none
CUL1	PPP1CA	8454	5499	86	0.804426	-0.0197733	0.67	NaN	none
CCNA2	FBXO5	890	26271	0	0.957445	-0.0131832	NA	HC	valid
CXCR4	STAT3	7852	6774	59	0.847908	-0.0197733	0.52	HC	valid
NCSTN	PSEN2	23385	5664	52	0.859838	0.0493994	0.86	NaN	none
CTNNB1	MAGI1	1499	9223	0	0.957445	0.0592581	0.79	NaN	none
ABL1	YWHAQ	25	10971	73	0.824868	-0.0329479	0.52	MC	less_valid
CSF2RB	PTPN11	1439	5781	25	0.908495	0.182507	0.89	HC	valid
CRK	TRIP6	1398	7205	54	0.856401	-0.00329597	NA	LC	less_valid
ACOX1	PEX5	51	5830	32	0.895469	0.1569	NA	LC	less_valid
CCND1	CDC25B	595	994	51	0.861564	0.12135	NA	LC	less_valid
CYBA	MYC	1535	4609	15	0.927614	0.329959	0.63	NaN	none
MAP3K3	YWHAH	4215	7533	45	0.872045	-0.0329479	0.73	HC	valid
CCNA1	CDK4	8900	1019	56	0.852987	0.0493994	NA	HC	valid
STAG1	STAG2	10274	10735	23	0.91227	0.0131832	0.87	NaN	none
RAC2	RHOD	5880	29984	62	0.84288	0.0658243	NA	HC	valid
CCNE2	CREBBP	9134	1387	12	0.933469	0.0592581	NA	MC	less_valid
IRAK4	PPP2CB	51135	5516	32	0.895469	-0.0329479	NA	HC	valid
GAB2	PTPN11	9846	5781	69	0.831341	0	0.96	HC	valid
IL28RA	IL29	163702	282618	29	0.901016	0.257733	0.52	NaN	none
PPP1CA	PPP2CA	5499	5515	61	0.84455	0.0131832	0.55	HC	valid
PIAS1	SMAD4	8554	4089	47	0.868529	0.00659186	0.76	NaN	none
EP300	TFDP2	2033	7029	35	0.889976	0.0658243	NA	LC	less_valid
CANX	HSPA4	821	3308	79	0.815321	-0.00659186	NA	LC	less_valid
CCNE2	PKMYT1	9134	9088	2	0.953386	0.0263617	NA	HC	valid
ARAF	TIRAP	369	114609	57	0.851288	0.0658243	0.68	NaN	none
AKT2	STAT6	208	6778	72	0.826478	0.0395311	0.63	HC	valid
PRKAR2A	SFN	5576	2810	26	0.906616	0.0164784	0.63	NaN	none
AKT1	CTBP1	207	1487	47	0.868529	-0.00329597	0.63	MC	less_valid
CDC20	EP300	991	2033	39	0.882734	-0.0592581	0.63	HC	valid
PTK2	TSC2	5747	7249	15	0.927614	-0.10834	0.78	NaN	none
CASP3	WEE1	836	7465	77	0.818481	-0.0526868	0.52	LC	less_valid
LNPEP	TRIP10	4012	9322	9	0.939379	0.0329479	NA	LC	less_valid
BDKRB2	CXCL6	624	6372	75	0.821664	0.0691052	NA	HC	valid
PPARD	SMAD3	5467	4088	46	0.870284	0.0920263	NA	HC	valid
CASP3	RASA1	836	5921	11	0.935433	0.245383	0.52	NaN	none
CDC20	CDKN1A	991	1026	86	0.804426	-0.0362399	0.72	NaN	none
DUSP22	MAP2K4	56940	6416	19	0.919894	0.12135	0.55	MC	less_valid
PRKAA1	PRKAB1	5562	5564	86	0.804426	0.0428215	0.98	NaN	none
CDC27	FBXO5	996	26271	9	0.939379	-0.0493994	0.73	LC	less_valid
HES1	JAG2	3280	3714	61	0.84455	-0.101821	NA	LC	less_valid
KRAS	RASSF5	3845	83593	76	0.82007	0.00329597	0.85	HC	valid
IL13	IL13RA2	3596	3598	13	0.931511	0.11485	0.65	NaN	none
AXIN1	TSC2	8312	7249	12	0.933469	0.12135	0.72	NaN	none
MCM2	RAD21	4171	5885	39	0.882734	0.0658243	0.63	NaN	none
CASP6	RB1	839	5925	71	0.828093	0.00329597	0.52	NaN	none
IL13RA2	IL4	3598	3565	25	0.908495	0.0164784	0.55	NaN	none
MAP3K3	PYGM	4215	5837	54	0.856401	0.0263617	0.72	LC	less_valid
CDC25B	SFN	994	2810	7	0.94335	0.00659186	0.83	LC	less_valid
AKT2	PITX2	208	5308	53	0.858116	0.0164784	NA	HC	valid
AXIN1	CSNK1G1	8312	53944	29	0.901016	0.0296551	NA	HC	valid
PPP1CB	RYR2	5500	6262	20	0.917979	-0.0197733	0.52	NaN	none
NCK1	SOCS7	4690	30837	18	0.921815	-0.0362399	0.78	HC	valid
CTBP1	PPARD	1487	5467	14	0.929559	-0.0691052	NA	LC	less_valid
LEF1	SMAD1	51176	4086	73	0.824868	0.00659186	0.59	NaN	none
CACNA1A	NOTCH1	773	4851	49	0.865035	-0.0526868	0.63	LC	less_valid
PDGFRA	STAT1	5156	6772	0	0.957445	0.124596	0.52	LC	less_valid
PPP3CB	SLC8A2	5532	6543	54	0.856401	-0.0493994	0.52	NaN	none
ADORA2B	PTGIR	136	5739	28	0.902877	0.0559731	NA	HC	valid
IL10RB	IL28A	3588	282616	41	0.879148	-0.10834	0.52	NaN	none
HRAS	RASSF5	3265	83593	85	0.805967	-0.0296551	0.95	HC	valid
CD44	CD9	960	928	64	0.839555	0.00988761	0.63	LC	less_valid
PITX2	SOX17	5308	64321	56	0.852987	0.0691052	NA	LC	less_valid
CDC6	CDKN1A	990	1026	52	0.859838	0.0230678	0.65	NaN	none
PIAS1	SMAD7	8554	4092	49	0.865035	0.00329597	0.63	NaN	none
IRS1	RPS6KB1	3667	6198	66	0.836253	-0.0131832	NA	HC	valid
PTPN11	TNFRSF1A	5781	7132	65	0.837901	0.0230678	0.69	NaN	none
PLCG1	SOCS7	5335	30837	17	0.923742	-0.0329479	0.52	HC	valid
AGTR1	CHRM3	185	1131	65	0.837901	0.105082	NA	HC	valid
RPS6KB1	TGFBR2	6198	7048	23	0.91227	0.0526868	NA	HC	valid
CCNA1	RBL2	8900	5934	1	0.955412	0.0197733	0.76	NaN	none
PIAS1	SIAH1	8554	6477	59	0.847908	0.131081	0.77	NaN	none
AURKA	BUB1B	6790	701	39	0.882734	-0.0395311	NA	HC	valid
CAPN1	RAD21	823	5885	73	0.824868	-0.0164784	0.63	NaN	none
EPOR	VAV1	2057	7409	87	0.802891	-0.0164784	0.83	HC	valid
CXCR4	PTPRC	7852	5788	67	0.83461	0.0493994	0.52	NaN	none
AKT1	MAPK8IP1	207	9479	74	0.823263	0.269999	0.8	HC	valid
POLR3A	POLR3H	11128	171568	86	0.804426	0.0428215	0.79	MC	less_valid
ABL1	SFN	25	2810	0	0.957445	-0.0493994	0.65	MC	less_valid
CTNNB1	FGFR1	1499	2260	4	0.949353	0.046111	0.63	NaN	none
PSEN2	RHEB	5664	6009	35	0.889976	0.0395311	0.49	NaN	none
ATP6V1A	ATP6V1G1	523	9550	24	0.91038	0.204713	0.63	MC	less_valid
IL28A	IL28RA	282616	163702	44	0.873812	0.144015	0.52	NaN	none
CUL1	FZR1	8454	51343	11	0.935433	0.00988761	NA	MC	less_valid
AXIN1	SMURF2	8312	64750	55	0.854691	0.0822135	0.65	NaN	none
ARAF	YWHAH	369	7533	3	0.951366	-0.0329479	0.86	NaN	none
ILK	ITGA5	3611	3678	48	0.866779	0.111597	0.72	NaN	none
FLT3	PTPN11	2322	5781	51	0.861564	-0.00988761	0.72	HC	valid
MAX	SMAD3	4149	4088	68	0.832972	0.321119	0.85	NaN	none
CALM3	CCNE1	808	898	21	0.91607	-0.163323	0.75	NaN	none
ACVR1C	SMAD4	130399	4089	10	0.937403	0.0526868	NA	HC	valid
EP300	MCM7	2033	4176	23	0.91227	0.0296551	0.63	NaN	none
CTBP1	MYC	1487	4609	73	0.824868	-0.0263617	0.63	LC	less_valid
CBLB	IRS1	868	3667	32	0.895469	0.046111	0.63	LC	less_valid
CREBBP	E2F3	1387	1871	4	0.949353	0.0592581	0.63	LC	less_valid
CUL1	MDM2	8454	4193	24	0.91038	-0.0887573	0.76	NaN	none
GRAP2	NCK1	9402	4690	58	0.849595	0.00329597	NA	HC	valid
CCND1	FBXO5	595	26271	15	0.927614	0.0428215	0.52	HC	valid
ARRB1	POLR2E	408	5434	65	0.837901	0.0296551	0.63	NaN	none
IKBKB	NGFR	3551	4804	79	0.815321	0.00988761	NA	HC	valid
CUL1	E2F1	8454	1869	4	0.949353	0.0263617	0.88	NaN	none
MCM3	RAD21	4172	5885	81	0.812181	0.0164784	0.63	NaN	none
KRAS	SPTAN1	3845	6709	59	0.847908	0.046111	NA	HC	valid
ATP1A3	ROCK2	478	9475	29	0.901016	0.0197733	0.63	MC	less_valid
AURKA	CCNB1	6790	891	4	0.949353	-0.0197733	NA	HC	valid
PTPN11	SOCS3	5781	9021	68.5	0.832156	0.0625419	0.79	HC	valid
MS4A2	PTPN6	2206	5777	43	0.875585	0.0428215	0.52	NaN	none
TGFB1	YWHAE	7040	7531	72	0.826478	0.0263617	0.88	NaN	none
CDH1	FYN	999	2534	42	0.877363	0.10834	0.78	NaN	none
CCNA2	CDK7	890	1022	78	0.816898	0.0985584	NA	HC	valid
CCNB1	CDC14A	891	8556	54	0.856401	0.105082	0.72	NaN	none
GLI2	STK36	2736	27148	3	0.951366	-0.269999	0.73	HC	valid
TSC2	YWHAH	7249	7533	85	0.805967	0.0756626	0.8	NaN	none
CDC6	MCM7	990	4176	31	0.897312	0.0329479	0.96	NaN	none
CREBBP	TRIP10	1387	9322	54	0.856401	0.0395311	0.72	LC	less_valid
INSR	PTPN11	3643	5781	48	0.866779	0.0230678	0.89	HC	valid
FLT3	NCK1	2322	4690	43	0.875585	0.0131832	0.63	HC	valid
MDM2	SFN	4193	2810	71	0.828093	-0.0428215	0.79	NaN	none
MYC	NCOR2	4609	9612	59	0.847908	0.0493994	0.63	NaN	none
IRAK4	PPP2CA	51135	5515	21.5	0.915118	-0.00988761	NA	HC	valid
INSR	RPS6KB1	3643	6198	32	0.895469	-0.0131832	NA	HC	valid
IRS1	PRKCQ	3667	5588	64	0.839555	0.0164784	0.55	HC	valid
CCNH	DDB2	902	1643	26	0.906616	0.0428215	NA	MC	less_valid
EIF4EBP1	PRKAA2	1978	5563	65.5	0.837076	0.0526868	NA	LC	less_valid
DLL4	JAG2	54567	3714	47	0.868529	-0.0887573	NA	HC	valid
BDKRB2	EDNRA	624	1909	14	0.929559	0.0263617	NA	HC	valid
CTBP1	NOS1	1487	4842	30	0.899161	-0.198389	0.62	NaN	none
ATP6V1B1	ATP6V1G3	525	127124	16	0.925675	0.0854863	NA	MC	less_valid
CSNK1D	PSEN2	1453	5664	84	0.807512	0.140786	0.66	NaN	none
E2F3	TFDP2	1871	7029	26	0.906616	0.0723847	0.82	LC	less_valid
MS4A2	PTPN11	2206	5781	48	0.866779	0	0.52	NaN	none
ATP6V1B1	ATP6V1D	525	51382	27	0.904743	0.131081	NA	MC	less_valid
CHMP2A	VPS24	27243	51652	27	0.904743	0.214167	0.95	NaN	none
CAMK2B	ITPKA	816	3706	30	0.899161	0.19522	0.52	NaN	none
IL2RG	IL4R	3561	3566	76	0.82007	0.169732	0.9	NaN	none
C1S	C2	716	717	56	0.852987	0.0362399	NA	HC	valid
MAML1	PIAS1	9794	8554	48	0.866779	-0.0230678	0.52	NaN	none
GNAI1	PCK1	2770	5105	8	0.941361	0.0756626	0.63	NaN	none
CCNB2	CDKN1A	9133	1026	1	0.955412	0.0263617	0.65	LC	less_valid
LRP2	MAGI1	4036	9223	14	0.81534	-0.00988761	0.87	LC	less_valid
BIRC2	MAP3K5	329	4217	16	0.81273	0.0362399	NA	HC	valid
MAGI1	RASA1	9223	5921	0	0.834001	0.0296551	0.52	HC	valid
CDK2	NGFR	1017	4804	3	0.829944	0.0164784	NA	HC	valid
DCC	EIF4E	1630	1977	11	0.819281	0.00659186	0.63	NaN	none
IQGAP1	PRKAR2A	8826	5576	13	0.81665	0.0197733	NA	HC	valid
PPP2R1B	TNFAIP3	5519	7128	1	0.832645	-0.0230678	0.72	NaN	none
IQGAP1	MYC	8826	4609	18	0.810133	0.0164784	0.63	NaN	none
YES1	ZAP70	7525	7535	2	0.831293	0.140786	NA	HC	valid
GRIA1	NEDD4	2890	4734	13	0.81665	0.00988761	0.73	NaN	none
WWP1	YWHAQ	11059	10971	21	0.806265	-0.00329597	0.63	NaN	none
CSF2RB	SYK	1439	6850	2	0.831293	0.0559731	0.52	HC	valid
FLT3	SOCS1	2322	8651	7	0.824584	0.0197733	0.73	HC	valid
PAK4	YWHAQ	10298	10971	1	0.832645	-0.0329479	0.86	HC	valid
PRKCI	RIPK1	5584	8737	19	0.80884	-0.046111	NA	HC	valid
PPP1CB	RIPK3	5500	11035	2	0.831293	0.0197733	0.72	HC	valid
GHR	IGF1R	2690	3480	24	0.802427	-0.0230678	NA	HC	valid
JAK2	SKP2	3717	6502	20	0.807551	0.0756626	0.63	NaN	none
ULK2	YWHAH	9706	7533	10	0.820602	-0.0592581	0.63	HC	valid
COL1A1	IGFBP3	1277	3486	0	0.834001	0.0559731	0.78	LC	less_valid
ATP6V1A	CD9	523	928	17	0.81143	-0.00329597	0.63	NaN	none
CCR7	SOCS1	1236	8651	0	0.834001	0.0263617	NA	HC	valid
ADRBK1	PITX2	156	5308	9	0.821926	0.0985584	NA	HC	valid
CDKN1B	PIN1	1027	5300	8	0.823253	0.0559731	0.68	NaN	none
PTPN6	SIRPA	5777	140885	8	0.823253	0.0395311	0.9	HC	valid
GHR	RIPK1	2690	8737	0	0.834001	-0.0296551	NA	LC	less_valid
NOTCH1	PIN1	4851	5300	18	0.810133	-0.0559731	NA	LC	less_valid
NF1	TIRAP	4763	114609	25	0.801154	-0.00659186	0.63	NaN	none
CD44	EPB41	960	2035	17	0.81143	0.0526868	0.52	NaN	none
CDK2	EPB41	1017	2035	0	0.834001	0.0854863	0.76	NaN	none
SMURF1	WEE1	57154	7465	17	0.81143	-0.0592581	0.52	HC	valid
ATP2A1	PCK1	487	5105	20	0.807551	-0.0723847	0.63	NaN	none
AMPH	SYNJ1	273	8867	1	0.832645	0.00988761	0.96	NaN	none
LCP2	MAP4K1	3937	11184	4	0.828599	0.0658243	0.52	HC	valid
GRIN1	PLAT	2902	5327	23	0.803703	0.0131832	0.52	NaN	none
DPYSL2	NUMB	1808	8650	18	0.810133	0.0296551	0.88	NaN	none
PTPN6	TNFRSF1A	5777	7132	0	0.834001	0.00329597	0.69	NaN	none
CFLAR	MAP2K4	8837	6416	2	0.831293	0.00988761	0.65	LC	less_valid
HMGCS2	YWHAQ	3158	10971	6	0.825919	0.0263617	0.63	NaN	none
F8	PHYH	2157	5264	10	0.820602	0.0428215	0.89	NaN	none
CUL1	DUSP1	8454	1843	23	0.803703	0.00659186	0.63	NaN	none
GADD45B	PPARA	4616	5465	23	0.803703	0.0723847	0.52	HC	valid
CSF2RB	ITGB1	1439	3688	7	0.824584	0.0493994	0.68	LC	less_valid
NFKB2	TBK1	4791	29110	1	0.832645	0.00329597	0.72	HC	valid
CASP6	PSEN2	839	5664	8	0.823253	0.0263617	0.66	NaN	none
CBL	EPHB1	867	2047	4	0.828599	0.0395311	0.7	LC	less_valid
BUB1B	MAP3K4	701	4216	14	0.81534	-0.0625419	0.52	HC	valid
INADL	TSC2	10207	7249	12	0.817964	-0.179319	NA	LC	less_valid
FGB	GHR	2244	2690	2	0.831293	0.0296551	0.63	HC	valid
CBLB	TNFRSF11A	868	8792	0	0.834001	0.00659186	0.52	NaN	none
PRF1	STAT5A	5551	6776	18	0.810133	0.00659186	NA	HC	valid
INSR	SH2B1	3643	25970	24	0.802427	-0.00659186	0.89	HC	valid
AP2A1	PIN1	160	5300	19	0.80884	0.0920263	0.63	NaN	none
BUB1B	TAOK1	701	57551	0	0.834001	-0.10834	NA	HC	valid
ATP1A1	TNFRSF1A	476	7132	13	0.81665	0.0230678	0.72	NaN	none
DBF4	MAP3K5	10926	4217	25	0.801154	0.0263617	NA	LC	less_valid
CFL1	YWHAQ	1072	10971	10	0.820602	-0.00659186	0.63	NaN	none
DAO	PRKAB2	1610	5565	0	0.834001	-8.67362e-18	0.63	NaN	none
C1QA	PPP1CA	712	5499	21	0.806265	0.0197733	0.63	NaN	none
AP2M1	IFNAR1	1173	3454	19	0.80884	0.0131832	0.82	NaN	none
CCNB2	TGFBR2	9133	7048	4	0.828599	0.0263617	0.78	HC	valid
MAPT	PHKG1	4137	5260	3	0.829944	0.0592581	0.63	NaN	none
EPHB2	MMP9	2048	4318	13	0.81665	0.0197733	0.52	LC	less_valid
ACTG1	CTBP2	71	1488	6	0.825919	-0.0230678	0.49	NaN	none
FADD	MAP3K5	8772	4217	8	0.823253	-0.00329597	NA	HC	valid
GSK3B	HSD17B4	2932	3295	4	0.828599	0.0329479	0.63	MC	less_valid
NTRK2	TIAM1	4915	7074	0	0.834001	0.185691	NA	LC	less_valid
CBL	FRS2	867	10818	7	0.824584	0.0296551	0.79	NaN	none
CAV1	NGFR	857	4804	6	0.825919	0.10834	0.75	NaN	none
MEFV	YWHAQ	4210	10971	4	0.828599	0.0164784	0.63	NaN	none
CASP6	NEDD4	839	4734	3	0.829944	-0.00988761	0.55	NaN	none
SOCS7	TUBB2C	30837	10383	20	0.807551	-0.0658243	0.52	NaN	none
FBP1	HSPA8	2203	3312	4	0.828599	0.0362399	0.63	NaN	none
CCNB1	PIN1	891	5300	6	0.825919	-0.0691052	0.62	NaN	none
PRKCZ	STAT6	5590	6778	7	0.824584	-0.0131832	0.52	HC	valid
BCAR1	YWHAH	9564	7533	5	0.827257	-0.0395311	0.63	MC	less_valid
ARRB1	YWHAE	408	7531	1	0.832645	-0.00988761	0.63	NaN	none
STAT6	THY1	6778	7070	8	0.823253	0.00659186	NA	HC	valid
SMAD3	TANK	4088	10010	7	0.824584	0.118102	0.49	NaN	none
CDKN1B	YES1	1027	7525	4	0.828599	0.046111	0.7	NaN	none
MAPT	PPP2R5A	4137	5525	13	0.81665	-0.0164784	0.52	NaN	none
ARRB1	RGS3	408	5998	11	0.819281	0	0.63	LC	less_valid
CD14	GLI2	929	2736	15	0.814033	-0.046111	NA	LC	less_valid
CAMK2A	SRF	815	6722	24	0.802427	0.0329479	0.66	LC	less_valid
PTPN11	YES1	5781	7525	7	0.824584	0.046111	NA	HC	valid
ETS2	ZFYVE9	2114	9372	13	0.81665	0.0197733	0.73	NaN	none
IL2RB	IRS1	3560	3667	7	0.824584	-0.0263617	NA	NaN	none
MAX	SMAD4	4149	4089	6	0.825919	0.046111	0.85	NaN	none
PML	STAT3	5371	6774	6	0.825919	0.00988761	0.88	NaN	none
DOCK1	ELMO1	1793	9844	14	0.81534	0.0197733	0.96	NaN	none
MYLK2	PCK1	85366	5105	16	0.81273	-0.0559731	0.63	NaN	none
IL2RB	SYK	3560	6850	0	0.834001	0.0985584	0.52	NaN	none
PPP1CA	ULK1	5499	8408	12	0.817964	0.0559731	0.63	HC	valid
EPB41L3	YWHAH	23136	7533	12	0.817964	-0.0263617	0.89	NaN	none
EPHA1	SMURF2	2041	64750	8	0.823253	0.0296551	0.52	NaN	none
PRKAB2	ULK1	5565	8408	2	0.831293	0.0658243	0.63	NaN	none
